# Supplementary material
Source: PubMed Central journal article supplement (PMC6386185)
Supplement: NIHMS1003286-supplement-sup.pdf [file NIHMS1003286-supplement-sup.pdf]

## SUPPLEMENTARY INFORMATION

# Optimization of a Series of Mu Opioid Receptor (MOR)

## Agonists with High G Protein Signaling Bias

Nicole M. Kennedy,<sup>1,#</sup> Cullen L. Schmid,<sup>2,#</sup> Nicolette C. Ross,<sup>1,2</sup> Kimberly M. Lovell,<sup>1,2</sup> Zhizhou Yue,<sup>1</sup> Yen Ting Chen,<sup>1</sup> Michael D. Cameron,<sup>2</sup> Laura M. Bohn,<sup>2,\*</sup> Thomas D. Bannister<sup>1,\*</sup>

<sup>1</sup> Department of Chemistry, The Scripps Research Institute, Jupiter, FL 33458, USA

<sup>2</sup> Department of Molecular Medicine, The Scripps Research Institute, FL 33458, USA

### Table of Contents

|                                                                                                                                                                                                |           |
|------------------------------------------------------------------------------------------------------------------------------------------------------------------------------------------------|-----------|
| <b>Scheme S1.</b> Synthetic route for the preparation of 4-chloro-1-(1-(2-chlorobenzyl)piperidin-4-yl)-1 <i>H</i> -benzo[ <i>d</i> ]imidazol-2(3 <i>H</i> )-one (29) from isonipecotamide..... | <b>S3</b> |
| Synthesis and characterization of 1-(2-Chlorobenzyl)piperidin-4-one (V).....                                                                                                                   | <b>S3</b> |
| Synthesis and characterization of <i>N</i> -(3-chloro-2-nitrophenyl)-1-(2-chlorobenzyl)piperidin-4-amine (VII).....                                                                            | <b>S4</b> |

|                                                                                                                                                                               |        |
|-------------------------------------------------------------------------------------------------------------------------------------------------------------------------------|--------|
| Synthesis and characterization of 3-Chloro- <i>N</i> <sup>l</sup> -(1-(2-chlorobenzyl)piperidin-4-yl)benzene-1,2-diamine (VIII).....                                          | S4-S5  |
| Synthesis and characterization of synthetic MOR analogs (2)-(51).....                                                                                                         | S5-S34 |
| <sup>1</sup> HNMR spectrum of 1-(1-(1-(2,3-Dihydrobenzo[ <i>b</i> ][1,4]dioxin-6-yl)ethyl)piperidin-4-yl)-1 <i>H</i> -benzo[ <i>d</i> ]imidazol-2(3 <i>H</i> )-one, (25)..... | S35    |
| <sup>1</sup> HNMR spectrum of 1-(1-(1-(4-(Trifluoromethoxy)phenyl)ethyl)piperidin-4-yl)-1 <i>H</i> -benzo[ <i>d</i> ]imidazol-2(3 <i>H</i> )-one, (26).....                   | S36    |
| <sup>1</sup> HNMR spectrum of 4-Chloro-1-(1-(2-chlorobenzyl)piperidin-4-yl)-1 <i>H</i> -benzo[ <i>d</i> ]imidazol-2(3 <i>H</i> )-one, (29).....                               | S37    |
| <sup>1</sup> HNMR spectrum of 5-Chloro-1-(1-(2-chlorobenzyl)piperidin-4-yl)-1 <i>H</i> -benzo[ <i>d</i> ]imidazol-2(3 <i>H</i> )-one, (30).....                               | S38    |
| <sup>1</sup> HNMR spectrum of 6-Chloro-1-(1-(2-chlorobenzyl)piperidin-4-yl)-1 <i>H</i> -benzo[ <i>d</i> ]imidazol-2(3 <i>H</i> )-one, (31).....                               | S39    |
| <sup>1</sup> HNMR spectrum of 5-Chloro-1-(1-(4-bromo-2-fluorobenzyl)piperidin-4-yl)-1 <i>H</i> -benzo[ <i>d</i> ]imidazol-2(3 <i>H</i> )-one, (41).....                       | S40    |

|                                                                                                                                                             |         |
|-------------------------------------------------------------------------------------------------------------------------------------------------------------|---------|
| <sup>1</sup> HNMR spectrum of 5,6-Dichloro-1-(1-(4-bromo-2-fluorobenzyl)piperidin-4-yl)-1 <i>H</i> -benzo[ <i>d</i> ]imidazol-2(3 <i>H</i> )-one, (44)..... | S41     |
| <sup>1</sup> HNMR spectrum of 5,6-Dichloro-1-(1-(4-bromobenzyl)piperidin-4-yl)-1 <i>H</i> -benzo[ <i>d</i> ]imidazol-2(3 <i>H</i> )-one, (46).....          | S42     |
| Molecular Strings for all compounds.....                                                                                                                    | S43-S44 |
| References.....                                                                                                                                             | S45     |

**Scheme S1.** Synthetic route for the preparation of 4-chloro-1-(1-(2-chlorobenzyl)piperidin-4-yl)-1*H*-benzo[*d*]imidazol-2(3*H*)-one (**29**) from isonipecotamide.

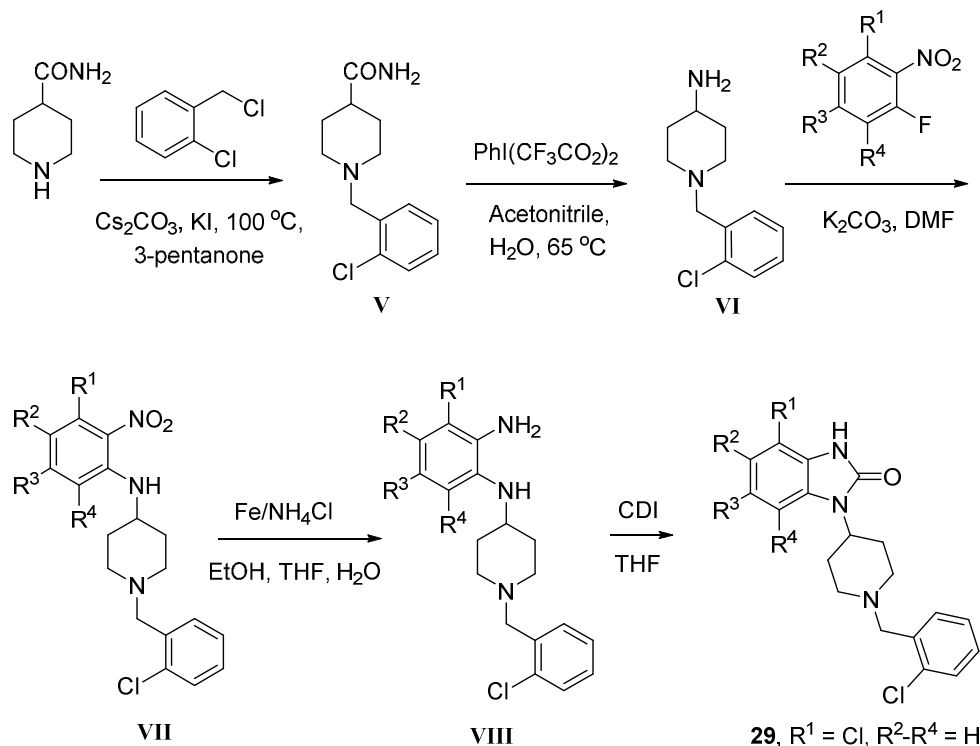

### 1-(2-Chlorobenzyl)piperidin-4-one, (**V**)<sup>1</sup>

A mixture of isonipecotamide (5.0 g, 39 mmol),  $\text{Cs}_2\text{CO}_3$  (8.0 g, 24 mmol), potassium iodide (650 mg, 3.9 mmol), 3-pentanone (25 mL), and 2-chlorobenzyl chloride (6.1 mL, 47 mmol) was stirred for 5 h at  $100\text{ }^\circ\text{C}$ . The mixture was filtered hot and the filtercake was washed with acetone. The filtrate was concentrated and the resulting slurry was recrystallized in acetone to afford pure product **V** (7.2 g, 73% yield).  $^1\text{H}$  NMR (400 MHz,  $\text{CDCl}_3$ )  $\delta$  7.48 (d,  $J = 7.2$  Hz, 1H), 7.33 (dd,  $J = 7.8, 1.4$  Hz, 1H), 7.23 (td,  $J = 6.8, 1.4$  Hz, 1H), 7.17 (td,  $J = 7.6, 2.0$  Hz, 1H), 5.59 (d,  $J = 41.2$  Hz, 2H), 3.61 (s, 2H), 2.96 (dd,  $J = 8.8, 2.8$  Hz, 2H), 2.21-2.10 (m, 2H), 1.87 (d,  $J = 10.8$  Hz, 2H), 1.78 (qd,  $J = 12.4, 3.6$  Hz, 2H); MS( $m/z$ ):  $[\text{M} + \text{H}]$  calc'd for  $\text{C}_{13}\text{H}_{18}\text{ClN}_2\text{O}$  is 253.10, found 253.06.

### ***N*-(3-chloro-2-nitrophenyl)-1-(2-chlorobenzyl)piperidin-4-amine, (VII)**

A mixture of bis(trifluoroacetoxy)iodobenzene (3.6 g, 8.4 mmol), **V** (2.0 g, 7.9 mmol), acetonitrile (20 mL), and water (15 mL) was heated at 65 °C overnight. Upon completion, the reaction mixture was quenched with HCl<sub>(aq)</sub> and extracted with diethyl ether. The aqueous layer was then saturated with K<sub>2</sub>CO<sub>3</sub> and extracted with CH<sub>2</sub>Cl<sub>2</sub>; the combined organic layers were dried over Na<sub>2</sub>SO<sub>4</sub> and concentrated to dryness. The crude product, 1-(2-chlorobenzyl)piperidin-4-amine (**VI**), was used without further purification (1.6 g). MS(*m/z*): [M + H] calc'd for C<sub>12</sub>H<sub>18</sub>ClN<sub>2</sub> is 225.11, found 224.89.

A mixture of **VI** (266 mg, 1.2 mmol), 2-chloro-6-fluoronitrobenzene (176 mg, 1.0 mmol), K<sub>2</sub>CO<sub>3</sub> (276 mg, 2.0 mmol), and DMF (5 mL) was stirred at room temperature overnight under argon. The reaction mixture was quenched with water and the aqueous layer was extracted with CH<sub>2</sub>Cl<sub>2</sub>; the combined organic layers were dried over Na<sub>2</sub>SO<sub>4</sub> and concentrated to dryness. Purification via silica gel chromatography afforded pure product **VII** (392 mg, 87% yield). <sup>1</sup>H NMR (400 MHz, CDCl<sub>3</sub>) δ 7.49 (d, *J* = 6.0 Hz, 1H), 7.36 (dd, *J* = 7.6, 1.2 Hz, 1H), 7.27-7.17 (m, 3H), 6.72 (dd, *J* = 6.4, 3.2 Hz, 1H), 5.76 (d, *J* = 6.8 Hz, 1H), 3.66 (s, 2H), 3.44-3.42 (m, 1H), 2.87 (d, *J* = 10.8 Hz, 2H), 2.32 (t, *J* = 10.8 Hz, 2H), 2.03 (d, *J* = 10.4 Hz, 2H), 1.64-1.57 (m, 2H); MS(*m/z*): [M + H] calc'd for C<sub>18</sub>H<sub>20</sub>Cl<sub>2</sub>N<sub>3</sub>O<sub>2</sub> is 380.09, found 379.09.

### **3-Chloro-*N*'-(1-(2-chlorobenzyl)piperidin-4-yl)benzene-1,2-diamine, (VIII)**

A mixture of **VII** (114 mg, 0.3 mmol), ammonium chloride (16 mg, 0.3 mmol), iron powder (134 mg, 2.4 mmol), EtOH (3 mL), THF (1 mL), and water (0.5 mL) was stirred at 100 °C for 3 h. and

then filtered through a pad of Celite®. The pad was washed with MeOH and the filtrate was concentrated to dryness. Purification via silica gel chromatography afforded pure product **VIII** (70 mg, 67% yield). <sup>1</sup>H NMR (400 MHz, CDCl<sub>3</sub>) δ 7.51 (t, *J* = 5.6 Hz, 1H), 7.35 (dd, *J* = 7.8, 1.4 Hz, 1H), 7.25 (td, *J* = 7.4, 1.2 Hz, 1H), 7.20 (td, *J* = 7.4, 2.0 Hz, 1H), 6.82-6.65 (m, 3H), 6.57 (dd, *J* = 7.8, 1.0 Hz, 1H), 3.66 (d, *J* = 2.4 Hz, 2H), 3.29 (tt, *J* = 12.8, 4.0 Hz, 1H), 2.91 (d, *J* = 10.0 Hz, 2H), 2.30 (t, *J* = 10.2 Hz, 2H), 2.08-2.04 (m, 2H), 1.57 (dd, *J* = 12.4, 10.4 Hz, 2H); MS(*m/z*): [M+H] calc'd for C<sub>18</sub>H<sub>22</sub>Cl<sub>2</sub>N<sub>3</sub> is 350.11, found 348.11.

**1-(1-(2-Chlorobenzyl)piperidin-4-yl)-1H-benzo[d]imidazol-2(3H)-one, (2)**

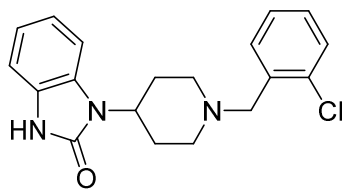

A mixture of 1-(piperidin-4-yl)-1H-benzo[d]imidazol-2(3H)-one (free base, 110 mg, 0.5 mmol), 2-chlorobenzaldehyde (0.2 g, 1.4 mmol), AcOH (drops), NaBH(OAc)<sub>3</sub> (0.3 g, 1.4 mmol), and DCE (5 mL) was stirred at room temperature overnight under argon. The reaction mixture was quenched with saturated NaHCO<sub>3</sub> and then extracted with CH<sub>2</sub>Cl<sub>2</sub>; the combined organic layers were dried over Na<sub>2</sub>SO<sub>4</sub> and concentrated to dryness. Purification via silica gel chromatography afforded pure product **2** (78 mg, 45% yield). <sup>1</sup>H NMR (400 MHz, (CD<sub>3</sub>)<sub>2</sub>SO) δ 10.83 (s, 1H), 7.58 (dd, *J* = 7.6, 1.6 Hz, 1H), 7.44 (dd, *J* = 7.8, 1.4 Hz, 1H), 7.38-7.34 (m, 2H), 7.32-7.22 (m, 1H), 6.99-6.96 (m, 3H), 4.17 (tt, *J* = 12.2, 4.2 Hz, 1H), 3.63 (s, 2H), 2.97 (d, *J* = 11.6 Hz, 2H), 2.38 (qd, *J* = 12.2, 3.6 Hz, 2H), 2.22 (t, *J* = 11.0 Hz, 2H), 1.65 (dd, *J* = 12.0, 2.4 Hz, 2H); MS(*m/z*): [M+H] calc'd for C<sub>19</sub>H<sub>21</sub>ClN<sub>3</sub>O is 342.13, found 342.10; HPLC *t*<sub>R</sub> = 3.57 min.

**1-(1-(3-Chlorobenzyl)piperidin-4-yl)-1H-benzo[d]imidazol-2(3H)-one, (3)**

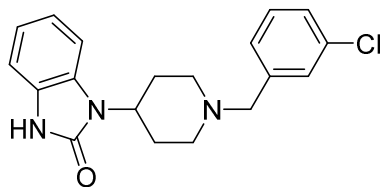

This compound was prepared according to the procedure for compound **2** in 29% yield.  $^1\text{H}$  NMR (400 MHz,  $\text{CDCl}_3$ )  $\delta$  9.69 (s, 1H), 8.02 (s, 1H), 7.39-7.26 (m, 3H), 7.09-7.04 (m, 4H), 4.44-4.35 (m, 1H), 3.54 (s, 2H), 3.02 (d,  $J = 11.2$  Hz, 2H), 2.48 (q,  $J = 8.8$  Hz, 2H), 2.18 (t,  $J = 11.4$  Hz, 2H), 1.80 (d,  $J = 11.2$  Hz, 2H); MS( $m/z$ ):  $[\text{M}+\text{H}]$  calc'd for  $\text{C}_{19}\text{H}_{21}\text{ClN}_3\text{O}$  is 342.13, found 342.15; HPLC  $t_{\text{R}} = 3.62$  min.

**1-(1-(4-Chlorobenzyl)piperidin-4-yl)-1H-benzo[d]imidazol-2(3H)-one, (4)<sup>2</sup>**

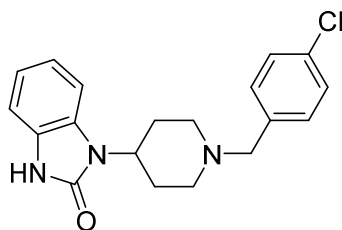

A mixture of 1-(piperidin-4-yl)-1H-benzo[d]imidazol-2(3H)-one (20 mg, 0.06 mmol), 4-chlorobenzyl bromide (12 mg, 0.06 mmol),  $\text{K}_2\text{CO}_3$  (28 mg, 0.2 mmol), NaI (9.0 mg, 0.06 mmol), and DMF (0.6 mL) was stirred at 90 °C for 24 h under argon. The reaction mixture was quenched with water and then extracted with EtOAc; the combined organic layers were dried over  $\text{Na}_2\text{SO}_4$  and concentrated to dryness. Purification via silica gel chromatography afforded pure product **4** (8.0 mg, 39% yield), which was dissolved in a solution of methane sulfonic acid in EtOH (0.06 M, 0.4 mL, 0.02 mmol). The solvent was removed under reduced pressure and the residue was dissolved in 1:1 water/acetonitrile. The solution was frozen and then subjected to lyophilization overnight giving product **4** in the form of a mesylate salt.  $^1\text{H}$

NMR mesylate (400 MHz, CD<sub>3</sub>OD)  $\delta$  7.56-7.54 (m, 4H), 7.29-7.26 (m, 1H), 7.10-7.07 (m, 3H), 4.56 (tt,  $J = 12.4, 4.0$  Hz, 1H), 4.39 (s, 2H), 3.66 (dd,  $J = 10.6, 1.8$  Hz, 2H), 3.27-3.23 (m, 2H), 2.80 (qd,  $J = 13.4, 3.8$  Hz, 2H), 2.72 (s, 3H), 2.09 (d,  $J = 14.8$  Hz, 2H); MS( $m/z$ ): [M + H] calc'd for C<sub>19</sub>H<sub>20</sub>ClN<sub>3</sub>O is 341.84, found 342.02; HPLC  $t_R = 3.67$  min.

**1-(1-(4-Methylbenzyl)piperidin-4-yl)-1H-benzo[d]imidazol-2(3H)-one, (5)**

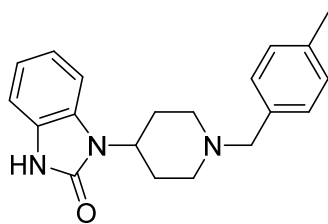

This compound was prepared according to the procedure for compound **2** in 59% yield. <sup>1</sup>H NMR (400 MHz, CDCl<sub>3</sub>)  $\delta$  9.78 (s, 1H), 7.31-7.28 (m, 3H), 7.16 (d,  $J = 8.0$  Hz, 2H), 7.11-7.04 (m, 3H), 4.38 (tt,  $J = 12.6, 3.8$  Hz, 1H), 3.58 (s, 2H), 3.08 (d,  $J = 10.0$  Hz, 2H), 2.53-2.51 (m, 2H), 2.35 (s, 3H), 2.20 (t,  $J = 10.8$  Hz, 2H), 1.81 (dd,  $J = 12.0, 2.0$  Hz, 2H); MS( $m/z$ ): [M+H] calc'd for C<sub>20</sub>H<sub>24</sub>N<sub>3</sub>O is 322.18, found 322.03; HPLC  $t_R = 3.59$  min.

**1-(1-(4-Bromobenzyl)piperidin-4-yl)-1H-benzo[d]imidazol-2(3H)-one, (6)**

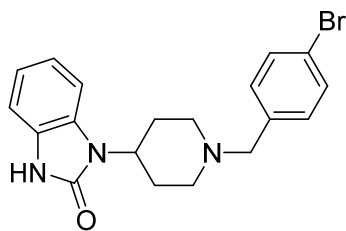

This compound was prepared according to the procedure for compound **2** in 56% yield. Methane sulfonic acid (17  $\mu$ L, 0.3 mmol) was added to a suspension of the product in EtOH (1 mL). The mixture was heated to 60 °C for 30 min. The solvent was



removed under reduced pressure and the residue was dissolved in 1:1 water/acetonitrile. The solution was frozen and then subjected to lyophilization overnight giving product **6** in the form of a mesylate salt. <sup>1</sup>H NMR mesylate (400 MHz, CD<sub>3</sub>OD) δ 7.71 (dd, *J* = 6.4, 2.0 Hz, 2H), 7.50 (d, *J* = 8.4 Hz, 2H), 7.27-7.25 (m, 1H), 7.10-7.07 (m, 3H), 4.55 (tt, *J* = 12.2, 4.4 Hz, 1H), 4.37 (s, 2H), 3.66 (d, *J* = 12.4 Hz, 2H), 3.26-3.24 (m, 2H), 2.80 (qd, *J* = 13.4, 3.6 Hz, 2H), 2.72 (s, 3H), 2.08 (d, *J* = 12.8 Hz, 2H); MS(*m/z*): [M + H] calc'd for C<sub>19</sub>H<sub>21</sub>BrN<sub>3</sub>O is 386.08, found 386.01; HPLC *t*<sub>R</sub> = 3.72 min.

**1-(1-(4-Methoxybenzyl)piperidin-4-yl)-1*H*-benzo[*d*]imidazol-2(3*H*)-one, (7)<sup>3</sup>**

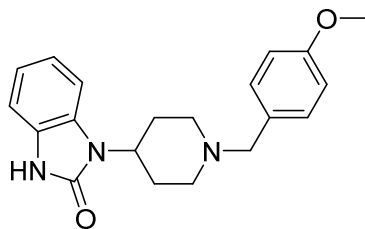

This compound was prepared according to the procedure for compound **2** in 77% yield. <sup>1</sup>H NMR (400 MHz, CDCl<sub>3</sub>) δ 9.76 (s, 1H), 7.30-7.28 (m, 3H), 7.11-7.04 (m, 3H), 6.89 (dd, *J* = 6.8, 2.0 Hz, 2H), 4.41-4.35 (m, 1H), 3.82 (s, 3H), 3.55 (s, 2H), 3.07 (d, *J* = 10.0 Hz, 2H), 2.50 (d, *J* = 8.8 Hz, 2H), 2.18 (t, *J* = 10.0 Hz, 2H), 1.81 (dd, *J* = 12.2, 1.8 Hz, 2H); MS(*m/z*): [M+H] calc'd for C<sub>20</sub>H<sub>24</sub>N<sub>3</sub>O<sub>2</sub> is 338.18, found 338.03; HPLC *t*<sub>R</sub> = 3.26 min.

***N*-(4-((4-(2-oxo-2,3-dihydro-1*H*-benzo[*d*]imidazol-1-yl)-piperidin-1-yl)methyl)phenyl)acetamide, (8)**

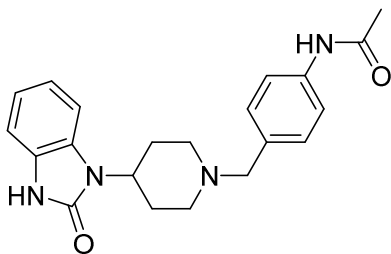

This compound was prepared according to the procedure for compound **2** in 34% yield. <sup>1</sup>H NMR (400 MHz, CDCl<sub>3</sub>) δ 9.42 (s, 1H), 7.47 (d, *J* = 8.4 Hz, 2H), 7.33-7.28 (m, 3H), 7.10-7.04 (m, 3H), 4.36 (tt, *J* = 12.6, 4.0 Hz, 1H), 3.54 (s, 2H), 3.03 (d, *J* = 11.6 Hz, 2H), 2.48 (q, *J* = 12.4 Hz, 2H), 2.16-2.12 (m, 5H), 1.79 (d, *J* = 10.4 Hz, 2H); MS(*m/z*): [M+H] calc'd for C<sub>21</sub>H<sub>25</sub>N<sub>4</sub>O<sub>2</sub> is 365.19, found 365.06; HPLC *t*<sub>R</sub> = 3.09 min.

**(4-((4-(2-oxo-2,3-dihydro-1*H*-benzo[*d*]imidazol-1-yl)-piperidin-1-yl)methyl)benzyl)benzonitrile, (9)**

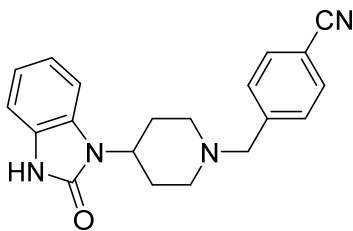

A mixture of 1-(piperidin-4-yl)-1*H*-benzo[*d*]imidazol-2(3*H*)-one (40 mg, 0.1 mmol), 4-cyanobenzyl bromide (24 mg, 0.1 mmol), K<sub>2</sub>CO<sub>3</sub> (20 mg, 0.1 mmol), and acetonitrile (1.2 mL) was stirred at 80 °C for 24 h. Upon completion, the solvent was removed under reduced pressure. Purification via silica gel chromatography afforded pure product **9** (30 mg, 75% yield). <sup>1</sup>H NMR (400 MHz, CDCl<sub>3</sub>) δ 9.18 (s, 1H), 7.64 (d, *J* = 8.0 Hz, 2H), 7.51 (d, *J* = 7.6 Hz, 1H), 7.28-7.27 (m, 1H), 7.11-7.05 (m, 3H), 4.40-4.34 (m, 1H), 3.62 (s, 2H), 3.00 (d, *J*

= 9.6 Hz, 2H), 2.50 (q,  $J = 11.6$  Hz, 2H), 2.23 (t,  $J = 11.2$  Hz, 2H), 1.83 (d,  $J = 10.0$  Hz, 2H); MS( $m/z$ ): [M+H] calc'd for C<sub>20</sub>H<sub>21</sub>N<sub>4</sub>O is 333.16, found 333.05; HPLC  $t_R = 3.29$  min.

**(4-((4-(2-oxo-2,3-dihydro-1H-benzo[d]imidazol-1-yl)-piperidin-1-yl)methyl)benzamide, (10)**

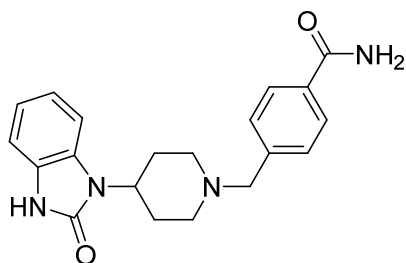

Hydrogen peroxide (50%, 28  $\mu$ L, 0.5 mmol) was added to a solution of compound **9** (16 mg, 0.05 mmol) and NaOH (3M, 17  $\mu$ L, 0.05 mmol) in EtOH (2.5 mL). The reaction mixture was stirred overnight at room temperature and then concentrated to dryness. Purification via silica gel chromatography afforded pure product **10** (5.0 mg, 30% yield). <sup>1</sup>H NMR (400 MHz, (CD<sub>3</sub>)<sub>2</sub>SO)  $\delta$  10.96 (s, 1H), 8.05 (s, 1H), 7.95 (d,  $J = 8.4$  Hz, 2H), 7.71 (d,  $J = 8.4$  Hz, 2H), 7.47 (s, 1H), 7.21 (d,  $J = 7.6$  Hz, 1H), 6.96 (td,  $J = 7.6, 1.6$  Hz, 2H), 6.91 (qd,  $J = 7.4, 1.6$  Hz, 1H), 4.70 (s, 2H), 4.47 (tt,  $J = 12.4, 4.4$  Hz, 1H), 3.68 (t,  $J = 11.6$  Hz, 2H), 3.36 (d,  $J = 10.0$  Hz, 2H), 2.97 (dd,  $J = 12.6, 9.6$  Hz, 2H), 1.75 (d,  $J = 13.2$  Hz, 2H); MS( $m/z$ ): [M+H] calc'd for C<sub>20</sub>H<sub>23</sub>N<sub>4</sub>O<sub>2</sub> is 351.17, found 351.07; HPLC  $t_R = 2.93$  min.

**1-(1-(3-Methoxybenzyl)piperidin-4-yl)-1H-benzo[d]imidazol-2(3H)-one, (11)<sup>4</sup>**

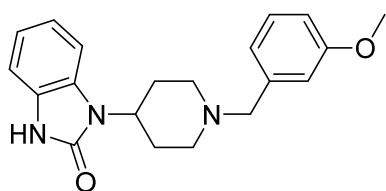

This compound was prepared according to the procedure for compound **2** in 92% yield. <sup>1</sup>H NMR (400 MHz, CDCl<sub>3</sub>)  $\delta$  10.04 (s, 1H), 7.31-7.24 (m, 2H), 7.13-7.11 (m, 1H), 7.05 (t,  $J = 4.0$  Hz, 2H), 6.96 (d,  $J = 6.8$  Hz, 2H), 6.82 (dd,  $J = 7.6, 1.6$  Hz, 1H),

4.39 (tt,  $J = 12.4, 4.0$  Hz, 1H), 3.84 (s, 3H), 3.58 (s, 2H), 3.08 (d,  $J = 10.8$  Hz, 2H), 2.52 (q,  $J = 12.0$  Hz, 2H), 2.21 (t,  $J = 11.2$  Hz, 2H), 1.81 (d,  $J = 10.4$  Hz, 2H); MS( $m/z$ ): [M+H] calc'd for  $C_{20}H_{24}N_3O_2$  is 338.18, found 338.08; HPLC  $t_R = 3.38$  min.

**1-(1-(3-(Trifluoromethoxy)benzyl)piperidin-4-yl)-1H-benzo[d]imidazol-2(3H)-one, (12)**

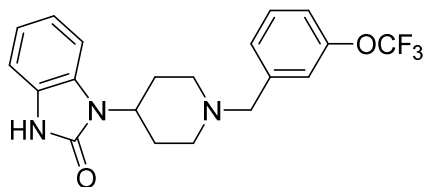

This compound was prepared according to the procedure for compound **2** in 43% yield.  $^1H$  NMR (400 MHz,  $CDCl_3$ )  $\delta$  10.34 (s, 1H), 7.36 (t,  $J = 7.8$  Hz, 1H), 7.32-7.28 (m, 3H), 7.16-7.12 (m, 2H), 7.08-7.06 (m, 2H), 4.40 (tt,  $J = 12.4, 4.0$  Hz, 1H), 3.60 (s, 2H), 3.04 (d,  $J = 11.6$  Hz, 2H), 2.51 (qd,  $J = 12.6, 3.8$  Hz, 2H), 2.22 (td,  $J = 11.8, 2.0$  Hz, 2H), 1.83 (dd,  $J = 12.0, 2.0$  Hz, 2H); MS( $m/z$ ): [M+H] calc'd for  $C_{20}H_{21}F_3N_3O_2$  is 392.15, found 392.06; HPLC  $t_R = 3.99$  min.

**1-(1-(3,4-Dichlorobenzyl)piperidin-4-yl)-1H-benzo[d]imidazol-2(3H)-one, (13)**

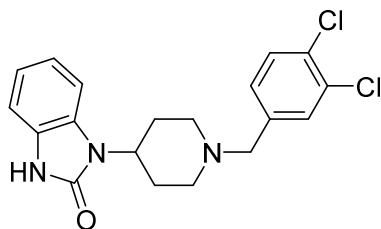

This compound was prepared according to the procedure for compound **2** in 13% yield.  $^1H$  NMR (400 MHz,  $CDCl_3$ )  $\delta$  9.89 (s, 1H), 7.49 (d  $J = 1.6$  Hz, 1H), 7.41 (d,  $J = 8.4$  Hz, 1H), 7.28 (dd,  $J = 6.0, 2.8$  Hz, 1H), 7.22 (dd,  $J = 8.2, 1.8$  Hz, 1H), 7.14-7.11 (m, 1H), 7.08-7.07 (m, 2H), 4.38 (tt,  $J = 12.4, 4.0$  Hz, 1H), 3.51 (s, 2H), 3.01 (d,  $J = 11.6$  Hz,

2H), 2.49 (qd,  $J = 12.4, 4.0$  Hz, 2H), 2.20 (td,  $J = 11.8, 2.0$  Hz, 2H), 1.82 (dd,  $J = 12.0, 2.4$  Hz, 2H); MS( $m/z$ ): [M+H] calc'd for  $C_{19}H_{20}Cl_2N_3O$  is 376.09, found 376.11; HPLC  $t_R = 3.98$  min.

**1-(1-(4-Chloro-2-Methylbenzyl)piperidin-4-yl)-1*H*-benzo[*d*]imidazol-2(3*H*)-one, (14)**

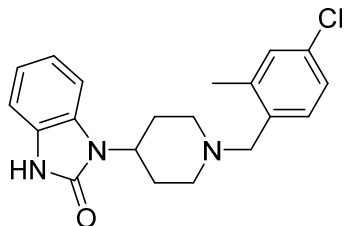

This compound was prepared according to the procedure for compound **2** in 23% yield.  $^1H$  NMR (400 MHz,  $CDCl_3$ )  $\delta$  9.42 (s, 1H), 7.23 (d,  $J = 6.0$  Hz, 2H), 7.17-7.05 (m, 5H), 4.38 (tt,  $J = 12.6, 4.0$  Hz, 1H), 3.47 (s, 2H), 3.01 (d,  $J = 11.2$  Hz, 2H), 2.44 (qd,  $J = 12.4, 3.8$  Hz, 2H), 2.40 (s, 3H), 2.20 (t,  $J = 11.2$  Hz, 2H), 1.80 (dd,  $J = 11.0, 2.0$  Hz, 2H); MS( $m/z$ ): [M+H] calc'd for  $C_{20}H_{23}ClN_3O$  is 356.15, found 356.14; HPLC  $t_R = 3.73$  min.

**1-(1-(4-Bromo-2-fluorobenzyl)piperidin-4-yl)-1*H*-benzo[*d*]imidazol-2(3*H*)-one, (15)**

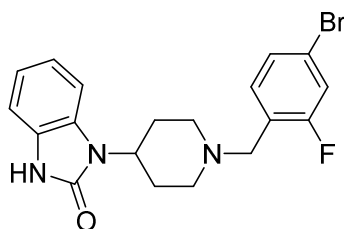

This compound was prepared according to the procedure for compound **2** in 33% yield.  $^1H$  NMR (400 MHz,  $CD_3OD$ )  $\delta$  7.40-7.35 (m, 4H), 7.06-7.04 (m, 3H), 4.30 (tt,  $J = 12.4, 4.4$  Hz, 1H), 3.65 (d,  $J = 1.2$  Hz, 2H), 3.09 (dd,  $J = 9.8, 1.8$  Hz, 2H), 2.53 (qd,  $J = 12.8, 4.0$  Hz, 2H), 2.29 (td,  $J = 12.2, 2.0$  Hz, 2H), 1.76 (dd,  $J = 12.0, 2.4$  Hz, 2H); MS( $m/z$ ): [M+H] calc'd for  $C_{19}H_{19}BrFN_3O$  is 404.07, found 404.23; HPLC  $t_R = 3.74$  min.

**1-(1-(1-(Phenyl)ethyl)piperidin-4-yl)-1*H*-benzo[*d*]imidazol-2(3*H*)-one, (16)<sup>5</sup>**

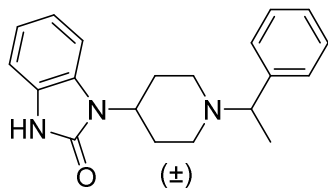

This compound was prepared according to the procedure for compound **1** in 74% yield. <sup>1</sup>H NMR (400 MHz, (CD<sub>3</sub>)<sub>2</sub>SO) δ 10.80 (s, 1H), 7.34 (t, *J* = 3.0 Hz, 4H), 7.26-7.19 (m, 2H), 6.99-6.95 (m, 3H), 4.05 (tt, *J* = 12.6, 4.0 Hz, 1H), 3.53 (q, *J* = 6.8 Hz, 1H), 3.10 (d, *J* = 10.0 Hz, 1H), 2.89 (d, *J* = 9.6 Hz, 1H), 2.45-2.23 (m, 2H), 2.07 (td, *J* = 10.4, 2.4 Hz, 1H), 1.97 (td, *J* = 10.8, 2.0 Hz, 1H), 1.66 (d, *J* = 10.8 Hz, 1H), 1.58 (d, *J* = 10.4 Hz, 1H), 1.33 (d, *J* = 6.8 Hz, 3H); MS(*m/z*): [M + H] calc'd for C<sub>20</sub>H<sub>24</sub>N<sub>3</sub>O is 322.18, found 321.96; HPLC *t*<sub>R</sub> = 3.52 min.

**1-(1-(1-(2-Chlorophenyl)ethyl)piperidin-4-yl)-1*H*-benzo[*d*]imidazol-2(3*H*)-one, (17)<sup>6</sup>**

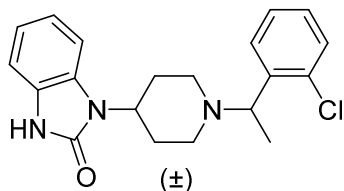

A mixture of 1-(piperidin-4-yl)-1*H*-benzo[*d*]imidazol-2(3*H*)-one (20 mg, 0.06 mmol), 2'-chloroacetophenone (36 mg, 0.2 mmol), and Ti(O*i*Pr)<sub>4</sub> (0.2 mL, 0.6 mmol) was stirred at 50 °C for 24 h under argon and then was cooled to room temperature. A mixture of NaCNBH<sub>3</sub> (11 mg, 0.2 mmol) in EtOH (0.2 mL) was then added dropwise and the reaction mixture was stirred overnight at room temperature. Upon completion, the solvent was removed under reduced pressure. Purification via silica gel chromatography afforded pure product **17** (13 mg, 61% yield). <sup>1</sup>H NMR (400 MHz, CD<sub>3</sub>OD) δ 7.66 (dd, *J* = 7.6, 1.6 Hz, 1H), 7.41 (dd, *J* = 8.0, 1.2 Hz, 1H), 7.38-7.33 (m, 2H), 7.26 (td, *J* = 7.6, 1.6 Hz, 1H), 7.09-7.04 (m,

3H), 4.29 (tt,  $J = 12.4, 4.0$  Hz, 1H), 4.20 (q,  $J = 6.8$  Hz, 1H), 3.49 (dt  $J = 12.0, 1.8$  Hz, 1H), 3.02 (dd,  $J = 11.6, 2.8$  Hz, 1H), 2.62 (qd,  $J = 12.6, 4.0$  Hz, 1H), 2.46 (qd,  $J = 12.4, 4.0$  Hz, 1H), 2.37 (td,  $J = 12.2, 2.4$  Hz, 1H), 2.26 (td,  $J = 12.2, 2.4$  Hz, 1H), 1.84 (dq,  $J = 12.8, 2.4$  Hz, 1H), 1.69 (dq,  $J = 12.8, 2.4$  Hz, 1H), 1.43 (d,  $J = 6.8$  Hz, 3H); MS( $m/z$ ):  $[M+H]$  calc'd for  $C_{20}H_{23}ClN_3O$  is 356.15, found 356.10; HPLC  $t_R = 3.57$  min.

**1-(1-(1-(4-Chlorophenyl)ethyl)piperidin-4-yl)-1H-benzo[d]imidazol-2(3H)-one, (18)**<sup>7</sup>

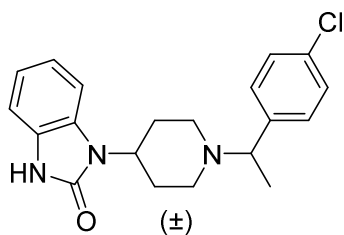

$Ti(OiPr)_4$  (0.3 mL, 1.0 mmol) was added to a solution of 1-(piperidin-4-yl)-1H-benzo[d]imidazol-2(3H)-one (free base, 0.1 g, 0.5 mmol) and 4'-chloroacetophenone (78  $\mu$ L, 0.6 mmol) in THF (5 mL). The reaction mixture was stirred at 80 °C for 5 h under argon and then was cooled to room temperature.  $NaBH(OAc)_3$  (0.3 g, 1.5 mmol) was then added and the reaction mixture was stirred overnight at room temperature. The reaction mixture was quenched with saturated  $NaHCO_3$  and then was filtered through a pad of Celite®. The filtrate was concentrated to dryness and the aqueous layer was extracted with  $CH_2Cl_2$ ; the combined organic layers were dried over  $Na_2SO_4$  and concentrated to dryness. Purification via silica gel chromatography afforded pure product **18** (31 mg, 19% yield).  $^1H$  NMR (400 MHz,  $CDCl_3$ )  $\delta$  7.93 (d,  $J = 8.0$  Hz, 1H), 7.59 (d,  $J = 8.4$  Hz, 2H), 7.46 (d,  $J = 8.4$  Hz, 2H), 7.19 (td,  $J = 7.6, 1.2$  Hz, 1H), 7.09-7.02 (m, 2H), 4.62-4.54 (m, 1H), 4.21-4.18 (m, 1H), 3.89 (d,  $J = 10.4$  Hz, 1H), 3.52 (d,  $J = 12.8$  Hz, 2H), 3.27 (qd,  $J = 11.6, 4.0$  Hz, 1H), 2.78 (q,  $J = 10.4$  Hz, 1H),

2.65 (q,  $J = 11.2$  Hz, 1H), 1.97 (d,  $J = 6.8$  Hz, 3H), 1.93-1.89 (m, 2H); MS( $m/z$ ):  $[M + H]$  calc'd for  $C_{20}H_{23}ClN_3O$  is 356.15, found 355.92; HPLC  $t_R = 3.76$  min.

**1-(1-(1-(4-Chlorophenyl)propyl)piperidin-4-yl)-1H-benzo[d]imidazol-2(3H)-one, (19)<sup>7</sup>**

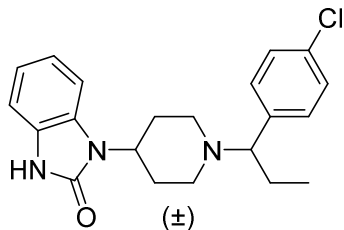

This compound was prepared according to the procedure for compound **18** in 10% yield.  $^1H$  NMR (400 MHz,  $(CD_3)_2SO$ )  $\delta$  10.79 (s, 1H), 7.40 (d,  $J = 8.4$  Hz, 2H), 7.30 (d,  $J = 8.4$  Hz, 2H), 7.18 (dd,  $J = 4.2, 2.0$  Hz, 1H), 6.99-6.94 (m, 3H), 4.57-4.45 (m, 1H), 3.97 (t,  $J = 12.2$  Hz, 1H), 3.07 (dd,  $J = 10.8, 3.6$  Hz, 1H), 2.92 (d,  $J = 9.2$  Hz, 1H), 2.39-2.24 (m, 2H), 2.18 (t,  $J = 7.2$  Hz, 1H), 2.02 (t,  $J = 11.6$  Hz, 1H), 1.90-1.68 (m, 2H), 1.64-1.57 (m, 2H), 0.74 (t,  $J = 7.2$  Hz, 3H); MS( $m/z$ ):  $[M+H]$  calc'd for  $C_{21}H_{25}ClN_3O$  is 370.16, found 370.10; HPLC  $t_R = 3.95$  min.

**1-(1-(1-(4-Fluorophenyl)ethyl)piperidin-4-yl)-1H-benzo[d]imidazol-2(3H)-one, (20)<sup>7</sup>**

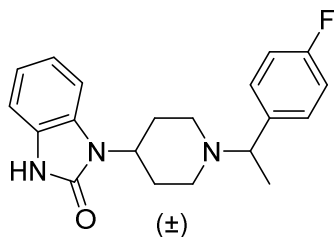

This compound was prepared according to the procedure for compound **18** in 51% yield.  $^1H$  NMR (400 MHz,  $CDCl_3$ )  $\delta$  10.26 (s, 1H), 7.33 (dd,  $J = 8.4, 2.8$  Hz, 2H), 7.29-7.28 (m, 1H), 7.13-7.01 (m, 5H), 4.31 (tt,  $J = 12.6, 4.0$  Hz, 1H), 3.52 (q,  $J = 5.8$



Hz, 1H), 3.20 (d,  $J = 10.4$  Hz, 1H), 2.96 (d,  $J = 10.4$  Hz, 1H), 2.54-2.37 (m, 2H), 2.18 (t,  $J = 11.2$  Hz, 1H), 2.07 (t,  $J = 12.0$  Hz, 1H), 1.84 (dd,  $J = 12.4, 1.6$  Hz, 1H), 1.75 (dd,  $J = 12.4, 1.6$  Hz, 1H), 1.40 (d,  $J = 6.4$  Hz, 3H); MS( $m/z$ ): [M+H] calc'd for  $C_{20}H_{23}FN_3O$  is 340.17, found 339.96; HPLC  $t_R = 3.41$  min.

**1-(1-(1-(4-Bromophenyl)ethyl)piperidin-4-yl)-1H-benzo[d]imidazol-2(3H)-one, (21)**

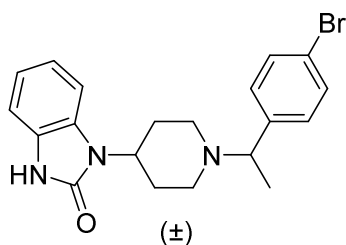

This compound was prepared according to the procedure for compound **17** in 88% yield.  $^1H$  NMR (400 MHz,  $(CD_3)_2SO$ )  $\delta$  10.84 (s, 1H), 7.52 (d,  $J = 8.4$  Hz, 2H), 7.32 (d,  $J = 8.4$  Hz, 2H), 7.20 (dd,  $J = 5.6, 2.4$  Hz, 1H), 6.98-6.95 (m, 3H), 4.05 (tt,  $J = 12.2, 4.0$  Hz, 1H), 3.54 (q,  $J = 6.8$  Hz, 1H), 3.06 (d,  $J = 10.8$  Hz, 1H), 2.86 (d,  $J = 10.0$  Hz, 1H), 2.33 (qd,  $J = 12.2, 4.0$  Hz, 2H), 2.06 (t,  $J = 10.8$  Hz, 1H), 1.97 (t,  $J = 11.0$  Hz, 1H), 1.65 (d,  $J = 10.4$  Hz, 1H), 1.58 (d,  $J = 11.2$  Hz, 1H), 1.30 (d,  $J = 6.8$  Hz, 3H); MS( $m/z$ ): [M+H] calc'd for  $C_{20}H_{23}BrN_3O$  is 400.09, found 400.10; HPLC  $t_R = 3.93$  min.

**1-(1-(1-(4-Methoxyphenyl)ethyl)piperidin-4-yl)-1*H*-benzo[*d*]imidazol-2(3*H*)-one, (22)**

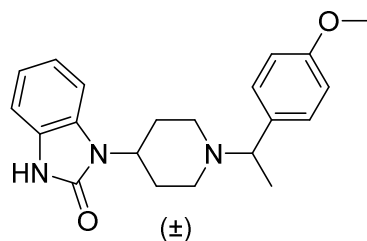

This compound was prepared according to the procedure for compound **18** in 40% yield. <sup>1</sup>H NMR (400 MHz, CDCl<sub>3</sub>) δ 8.18 (s, 1H), 7.20-7.18 (m, 2H), 7.00-6.96 (m, 4H), 6.80 (d, *J* = 7.2 Hz, 2H), 4.22-4.16 (m, 1H), 3.74 (s, 3H), 3.41 (q, *J* = 5.2 Hz, 1H), 3.10 (d, *J* = 10.0 Hz, 1H), 2.89 (d, *J* = 10.4 Hz, 1H), 2.40-2.28 (m, 2H), 2.08 (t, *J* = 12.2 Hz, 1H), 1.96 (t, *J* = 12.6 Hz, 1H), 1.77-1.65 (m, 2H), 1.31 (d, *J* = 5.6 Hz, 3H); MS(*m/z*): [M+H] calc'd for C<sub>21</sub>H<sub>26</sub>N<sub>3</sub>O<sub>2</sub> is 352.19, found 351.98; HPLC *t*<sub>R</sub> = 3.56 min.

**1-(1-(1-(4-Ethoxyphenyl)ethyl)piperidin-4-yl)-1*H*-benzo[*d*]imidazol-2(3*H*)-one, (23)**

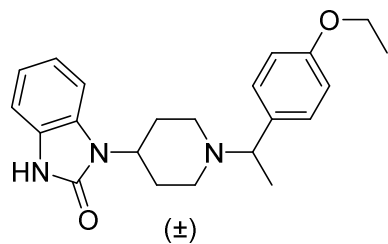

This compound was prepared according to the procedure for compound **18** in 58% yield. <sup>1</sup>H NMR (400 MHz, CDCl<sub>3</sub>) δ 10.89 (s, 1H), 7.29 (d, *J* = 8.8 Hz, 3H), 7.17-7.14 (m, 1H), 7.07-7.05 (m, 2H), 6.91 (d, *J* = 8.4 Hz, 2H), 4.34 (tt, *J* = 12.6, 4.0 Hz, 1H), 4.07 (q, *J* = 6.8 Hz, 2H), 3.55 (q, *J* = 6.6 Hz, 1H), 3.24 (d, *J* = 10.8 Hz, 1H), 3.04 (d, *J* = 10.8 Hz, 1H), 2.55 (qd, *J* = 12.0, 3.2 Hz, 1H), 2.45 (qd, *J* = 12.0, 3.2 Hz, 1H), 2.21 (t, *J* = 11.0 Hz, 1H), 2.10 (t, *J* = 11.0 Hz, 1H), 1.86 (dd, *J* = 12.4, 1.6 Hz, 1H), 1.78 (dd, *J* = 12.6, 1.8 Hz,

1H), 1.47-1.44 (m, 6H); MS(*m/z*): [M+H] calc'd for C<sub>22</sub>H<sub>28</sub>N<sub>3</sub>O<sub>2</sub> is 366.21, found 365.96; HPLC *t<sub>R</sub>* = 3.64 min.

**1-(1-(1-(4-(Isopropoxy)phenyl)ethyl)piperidin-4-yl)-1H-benzo[d]imidazol-2(3H)-one, (24)**

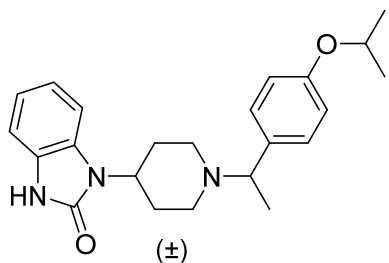

This compound was prepared according to the procedure for compound **17** in 65% yield. <sup>1</sup>H NMR (400 MHz, CD<sub>3</sub>OD) δ 7.38 (d, *J* = 8.8 Hz, 2H), 7.32-7.29 (m, 1H), 7.09-7.06 (m, 3H), 6.98 (d, *J* = 8.8 Hz, 2H), 4.63 (septet, *J* = 6.0 Hz, 1H), 4.40-4.37 (m, 1H), 4.16 (q, *J* = 7.2 Hz, 1H), 3.61 (d, *J* = 8.4 Hz, 1H), 3.35 (dd, *J* = 10.4, 3.2 Hz, 1H), 2.82-2.60 (m, 4H), 2.01-1.90 (m, 2H), 1.67 (d, *J* = 6.8 Hz, 3H), 1.32 (d, *J* = 6.0 Hz, 6H); MS(*m/z*): [M+H] calc'd for C<sub>23</sub>H<sub>30</sub>N<sub>3</sub>O<sub>2</sub> is 380.23, found 379.94; HPLC *t<sub>R</sub>* = 3.86 min.

**1-(1-(1-(2,3-Dihydrobenzo[*b*][1,4]dioxin-6-yl)ethyl)piperidin-4-yl)-1H-benzo[d]imidazol-2(3H)-one, (25)<sup>2</sup>**

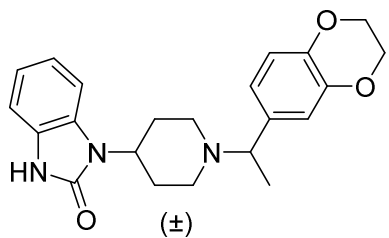

This compound was prepared according to the procedure for compound **18** in 56% yield. Methane sulfonic acid (17 μL, 0.3 mmol) was added to a suspension of **25** in EtOH (1 mL). The mixture was heated to 60 °C for 30 min. The solvent was removed under reduced pressure and the residue was dissolved in 1:1 water/acetonitrile. The solution was

frozen and then subjected to lyophilization overnight giving product **25** in the form of a mesylate salt.  $^1\text{H}$  NMR mesylate (400 MHz,  $\text{CD}_3\text{OD}$ )  $\delta$  7.29-7.26 (m, 1H), 7.10-7.06 (m, 4H), 7.01 (dd,  $J = 8.4, 2.4$  Hz, 1H), 6.96 (d,  $J = 8.4$  Hz, 1H), 4.51-4.41 (m, 2H), 4.28 (s, 4H), 3.84 (dd,  $J = 11.6, 2.2$  Hz, 1H), 3.49 (dd,  $J = 11.6, 2.8$  Hz, 1H), 3.14 (td,  $J = 13.0, 2.8$  Hz, 1H), 3.04 (td,  $J = 13.0, 2.8$  Hz, 1H), 2.88-2.77 (m, 2H), 2.72 (s, 3H), 2.12-2.01 (m, 2H), 1.77 (d,  $J = 6.8$  Hz, 3H); MS( $m/z$ ):  $[\text{M} + \text{H}]$  calc'd for  $\text{C}_{22}\text{H}_{26}\text{N}_3\text{O}_3$  is 380.19, found 379.87; HPLC  $t_{\text{R}} = 4.58$  min.

**1-(1-(1-(4-(Trifluoromethoxy)phenyl)ethyl)piperidin-4-yl)-1H-benzo[d]imidazol-2(3H)-one, (26)**

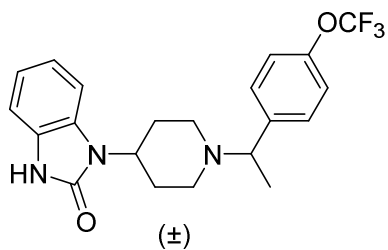

This compound was prepared according to the procedure for compound **18** in 8% yield.  $^1\text{H}$  NMR (400 MHz,  $(\text{CD}_3)_2\text{SO}$ )  $\delta$  10.82 (s, 1H), 7.49 (d,  $J = 8.4$  Hz, 2H), 7.33 (d,  $J = 8.0$  Hz, 2H), 7.21 (d,  $J = 6.4$  Hz, 1H), 7.00-6.96 (m, 3H), 4.07 (tt,  $J = 12.0, 4.0$  Hz, 1H), 3.60 (q,  $J = 6.6$  Hz, 1H), 3.07 (d,  $J = 10.4$ , 1H), 2.86 (d,  $J = 10.8$  Hz, 1H), 2.33 (sextet d,  $J = 12.4, 3.8$  Hz, 2H), 2.08 (t,  $J = 11.8$  Hz, 1H), 2.00 (t,  $J = 10.8$  Hz, 1H), 1.66 (d,  $J = 12.4$  Hz, 1H), 1.59 (d,  $J = 10.8$  Hz, 1H), 1.32 (d,  $J = 6.8$  Hz, 3H); MS( $m/z$ ):  $[\text{M} + \text{H}]$  calc'd for  $\text{C}_{21}\text{H}_{23}\text{F}_3\text{N}_3\text{O}_2$  is 406.17; found 405.96; HPLC  $t_{\text{R}} = 3.96$  min.

**1-(1-(1-(4-Bromo-2-fluorophenyl)ethyl)piperidin-4-yl)-1H-benzo[d]imidazol-2(3H)-one, (27)**

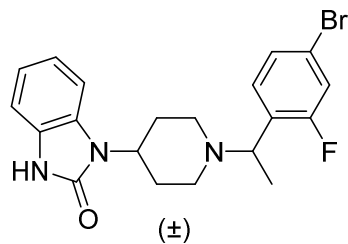

This compound was prepared according to the procedure for compound **18** in 7% yield. <sup>1</sup>H NMR (400 MHz, CDCl<sub>3</sub>) δ 8.73 (s, 1H), 7.36 (t, *J* = 7.6 Hz, 1H), 7.30-7.22 (m, 3H), 7.08-7.06 (m, 3H), 4.30-4.23 (m, 1H), 3.91 (q, *J* = 6.4 Hz, 1H), 3.25 (d, *J* = 10.8 Hz, 1H), 2.97 (d, *J* = 10.8 Hz, 1H), 2.50 (qd, *J* = 12.2, 3.6 Hz, 1H), 2.37 (qd, *J* = 12.4, 3.2 Hz, 1H), 2.17 (t, *J* = 11.4 Hz, 1H), 2.02 (t, *J* = 11.6 Hz, 1H), 1.84 (d, *J* = 11.2 Hz, 1H), 1.74 (d, *J* = 12.0 Hz, 1H), 1.39 (d, *J* = 6.4 Hz, 3H); MS(*m/z*): [M+H] calc'd for C<sub>20</sub>H<sub>22</sub>BrFN<sub>3</sub>O is 418.09, found 418.16; HPLC *t*<sub>R</sub> = 3.94 min.

**1-(1-(1-(4-Chloro-2-fluorophenyl)ethyl)piperidin-4-yl)-1H-benzo[d]imidazol-2(3H)-one,**

**(28)**

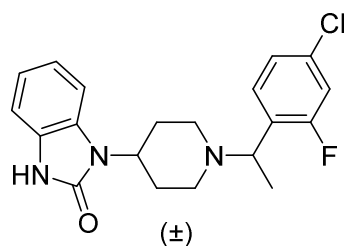

This compound was prepared according to the procedure for compound **18** in 33% yield. <sup>1</sup>H NMR (400 MHz, CDCl<sub>3</sub>) δ 10.15 (s, 1H), 7.42 (t, *J* = 7.4 Hz, 1H), 7.28-7.27 (m, 1H), 7.15 (d, *J* = 8.4 Hz, 1H), 7.13-7.04 (m, 4H), 4.32-4.26 (m, 1H), 3.94 (q, *J* = 6.8 Hz, 1H), 3.26 (d, *J* = 8.8 Hz, 1H), 2.99 (d, *J* = 8.8 Hz, 1H), 2.51 (d, *J* = 10.8 Hz, 1H), 2.40 (d, *J* = 10.8 Hz, 1H), 2.19 (t, *J* = 9.6 Hz, 1H), 2.03 (t, *J* = 10.6 Hz, 1H), 1.87 (t, *J* = 13.8

Hz, 1H), 1.76 (d,  $J = 11.6$  Hz, 1H), 1.41 (d,  $J = 5.6$  Hz, 3H); MS( $m/z$ ): [M+H] calc'd for  $C_{20}H_{22}ClFN_3O$  is 374.14, found 374.09; HPLC  $t_R = 3.71$  min.

**4-Chloro-1-(1-(2-chlorobenzyl)piperidin-4-yl)-1H-benzo[d]imidazol-2(3H)-one, (29)**<sup>8</sup>

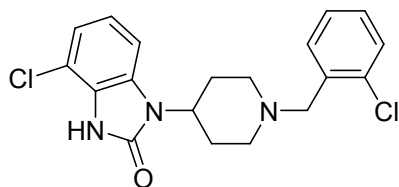

CDI (49 mg, 0.3 mmol) was slowly added to a solution of **VIII** (70 mg, 0.2 mmol) in THF (4 mL). The reaction mixture was stirred overnight at room temperature under argon and then quenched with 10% HCl<sub>(aq)</sub>. The aqueous layer was extracted with EtOAc. The combined organic layers were dried over Na<sub>2</sub>SO<sub>4</sub> and concentrated to dryness. Purification via silica gel chromatography afforded pure product **29** (61 mg, 81% yield). <sup>1</sup>H NMR (400 MHz, CD<sub>3</sub>OD)  $\delta$  7.71 (dd,  $J = 7.4, 1.8$  Hz, 1H), 7.62 (dd,  $J = 8.0, 1.6$  Hz, 1H), 7.57-7.47 (m, 2H), 7.22 (dd,  $J = 7.0, 1.8$  Hz, 1H), 7.11-7.03 (m, 2H), 4.65-4.55 (m, 3H), 3.73 (d,  $J = 12.0$  Hz, 2H), 3.43 (t,  $J = 12.2$  Hz, 2H), 2.81 (d,  $J = 13.2$  Hz, 2H), 2.09 (d,  $J = 14.8$  Hz, 2H); MS( $m/z$ ): [M+H] calc'd for  $C_{19}H_{20}Cl_2N_3O$  is 376.09, found 376.20; HPLC  $t_R = 3.49$  min.

**5-Chloro-1-(1-(2-chlorobenzyl)piperidin-4-yl)-1H-benzo[d]imidazol-2(3H)-one, (30)**

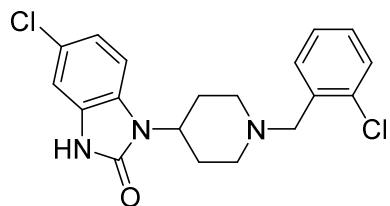

This compound was prepared according to the procedure for compound **2** in 39% yield from 5-chloro-1-(piperidin-4-yl)-1H-benzo[d]imidazol-2(3H)-one. <sup>1</sup>H NMR (400 MHz, (CD<sub>3</sub>)<sub>2</sub>SO) δ 11.03 (s, 1H), 7.57 (dd, *J* = 7.6, 1.6 Hz, 1H), 7.44 (dd, *J* = 7.8, 1.4 Hz, 1H), 7.36 (td, *J* = 7.4, 1.4 Hz, 1H), 7.29 (td, *J* = 7.5, 2.0 Hz, 1H), 7.24 (d, *J* = 8.4 Hz, 1H), 7.01 (td, *J* = 9.6, 2.0 Hz, 2H), 4.16 (tt, *J* = 12.0, 4.4 Hz, 1H), 3.62 (s, 2H), 2.96 (d, *J* = 11.2 Hz, 2H), 2.34 (qd, *J* = 12.4, 3.4 Hz, 2H), 2.21 (t, *J* = 11.0 Hz, 2H), 1.65 (dd, *J* = 11.6, 2.0 Hz, 2H); MS(*m/z*): [*M* + *H*] calc'd for C<sub>19</sub>H<sub>20</sub>Cl<sub>2</sub>N<sub>3</sub>O is 376.09, found 376.00; HPLC *t*<sub>R</sub> = 3.87 min.

**6-Chloro-1-(1-(2-chlorobenzyl)piperidin-4-yl)-1H-benzo[d]imidazol-2(3H)-one, (31)**

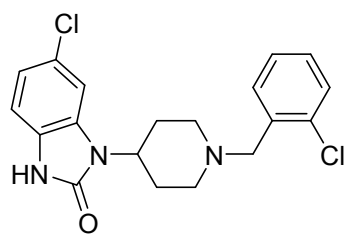

This compound was prepared according to the procedure for compound **29** in 56% yield from 5-chloro-*N*<sup>1</sup>-(1-(2-chlorobenzyl)piperidin-4-yl)benzene-1,2-diamine. <sup>1</sup>H NMR (400 MHz, CD<sub>3</sub>OD) δ 7.70 (dd, *J* = 7.4, 2.2 Hz, 1H), 7.63 (dd, *J* = 7.8, 1.4 Hz, 1H), 7.55 (td, *J* = 7.4, 2.0 Hz, 1H), 7.50 (td, *J* = 7.4, 1.6 Hz, 1H), 7.37 (d, *J* = 1.6 Hz, 1H), 7.08 (dd, *J* = 8.2, 2.2 Hz, 1H), 7.03 (d, *J* = 8.0 Hz, 1H), 4.61-4.55 (m, 3H), 3.74 (d, *J* = 12.4 Hz, 2H), 3.43 (t, *J* = 12.2 Hz, 2H), 2.78 (q, *J* = 12.0 Hz, 2H), 2.09 (d, *J* = 12.8 Hz, 2H); MS(*m/z*): [*M*+*H*] calc'd for C<sub>19</sub>H<sub>20</sub>Cl<sub>2</sub>N<sub>3</sub>O is 376.09, found 376.13; HPLC *t*<sub>R</sub> = 3.81 min.

**7-Chloro-1-(1-(2-chlorobenzyl)piperidin-4-yl)-1H-benzo[d]imidazol-2(3H)-one, (32)**

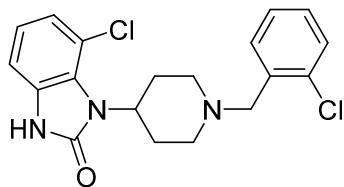

This compound was prepared according to the procedure for compound **29** in 9% yield from 6-chloro-*N*<sup>1</sup>-(1-(2-chlorobenzyl)piperidin-4-yl)benzene-1,2-diamine. <sup>1</sup>H NMR (400 MHz, CDCl<sub>3</sub>) δ 7.85 (s, 1H), 7.46 (t, *J* = 4.6 Hz, 1H), 7.40-7.38 (m, 2H), 7.06-7.00 (m, 4H), 5.23-5.16 (m, 1H), 4.55 (s, 2H), 3.81 (d, *J* = 8.0 Hz, 2H), 3.30 (t, *J* = 11.4 Hz, 2H), 2.94 (t, *J* = 10.8 Hz, 2H), 2.06 (d, *J* = 10.0 Hz, 2H); MS(*m/z*): [M+H] calc'd for C<sub>19</sub>H<sub>20</sub>Cl<sub>2</sub>N<sub>3</sub>O is 376.09, found 376.13; HPLC *t*<sub>R</sub> = 3.91 min.

**5-Methyl-1-(1-(2-chlorobenzyl)piperidin-4-yl)-1H-benzo[d]imidazol-2(3H)-one, (33)<sup>8</sup>**

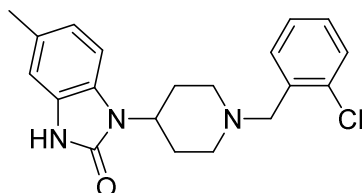

This compound was prepared according to the procedure for compound **29** in 56% yield from 4-methyl-*N*<sup>1</sup>-(1-(2-chlorobenzyl)piperidin-4-yl)benzene-1,2-diamine. <sup>1</sup>H NMR (400 MHz, CDCl<sub>3</sub>) δ 7.78 (s, 1H), 7.54 (d, *J* = 5.6 Hz, 1H), 7.37 (d, *J* = 8.0 Hz, 1H), 7.20-7.15 (m, 2H), 6.89-6.86 (m, 2H), 4.37-4.31 (m, 1H), 3.68 (s, 2H), 3.07 (d, *J* = 10.8 Hz, 2H), 2.45 (t, *J* = 12.0 Hz, 2H), 2.37 (s, 3H), 2.29 (t, *J* = 10.8 Hz, 2H), 1.80 (d, *J* = 13.2 Hz, 2H); MS(*m/z*): [M+H] calc'd for C<sub>20</sub>H<sub>23</sub>ClN<sub>3</sub>O is 356.15, found 356.13; HPLC *t*<sub>R</sub> = 3.74 min.



**5-Bromo-1-(1-(2-chlorobenzyl)piperidin-4-yl)-1H-benzo[d]imidazol-2(3H)-one, (34)**

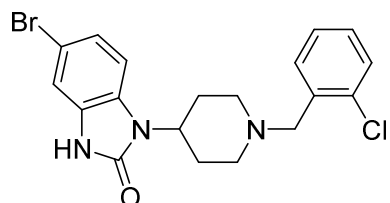

This compound was prepared according to the procedure for compound **2** in 29% yield from 5-bromo-1-(piperidin-4-yl)-1H-benzo[d]imidazol-2(3H)-one. <sup>1</sup>H NMR (400 MHz, CD<sub>3</sub>OD) δ 7.56 (dd, *J* = 7.4, 1.8 Hz, 1H), 7.42 (dd, *J* = 7.6, 1.6 Hz, 1H), 7.39-7.37 (m, 1H), 7.33 (td, *J* = 7.4, 1.8 Hz, 1H), 7.28 (td, *J* = 7.4, 1.8 Hz, 1H), 7.07-7.04 (m, 2H), 4.33 (tt, *J* = 12.2, 4.6 Hz, 1H), 3.75 (s, 2H), 3.14 (dd, *J* = 9.6, 2.0 Hz, 2H), 2.55 (qd, *J* = 12.6, 3.8 Hz, 2H), 2.36 (td, *J* = 12.2, 2.0 Hz, 2H), 1.76 (dd, *J* = 12.2, 2.6 Hz, 2H); MS(*m/z*): [M+H] calc'd for C<sub>19</sub>H<sub>20</sub>BrClN<sub>3</sub>O is 420.04, found 420.02; HPLC *t*<sub>R</sub> = 3.91 min.

**5-Fluoro-1-(1-(2-chlorobenzyl)piperidin-4-yl)-1H-benzo[d]imidazol-2(3H)-one, (35)**

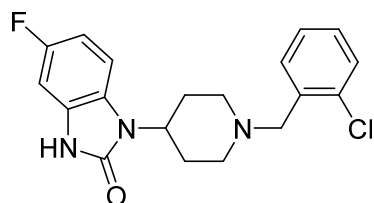

This compound was prepared according to the procedure for compound **2** in 22% yield from 5-fluoro-1-(piperidin-4-yl)-1H-benzo[d]imidazol-2(3H)-one. <sup>1</sup>H NMR (400 MHz, CD<sub>3</sub>OD) δ 7.55 (dd, *J* = 7.4, 1.8 Hz, 1H), 7.41 (dd, *J* = 7.8, 1.4 Hz, 1H), 7.35-7.25 (m, 3H), 6.84-6.78 (m, 2H), 4.30 (tt, *J* = 12.4, 4.4 Hz, 1H), 3.73 (s, 2H), 3.12 (dd, *J* = 9.6, 2.0 Hz, 2H), 2.50 (qd, *J* = 12.6, 3.6 Hz, 2H), 2.33 (td, *J* = 12.0, 2.0 Hz, 2H), 1.75 (dd, *J* = 12.2, 2.2 Hz, 2H); MS(*m/z*): [M+H] calc'd for C<sub>19</sub>H<sub>20</sub>ClFN<sub>3</sub>O is 360.12, found 360.10; HPLC *t*<sub>R</sub> = 3.88 min.

**5-Methoxy-1-(1-(2-chlorobenzyl)piperidin-4-yl)-1H-benzo[d]imidazol-2(3H)-one, (36)**

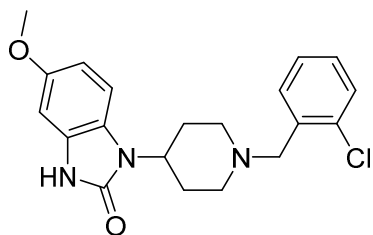

This compound was prepared according to the procedure for compound **29** in 11% yield from 4-methoxy-*N*<sup>1</sup>-(1-(2-chlorobenzyl)piperidin-4-yl)benzene-1,2-diamine. <sup>1</sup>H NMR (400 MHz, CDCl<sub>3</sub>) δ 9.06 (s, 1H), 7.80 (dd, *J* = 5.4, 1.6 Hz, 1H), 7.49-7.46 (m, 1H), 7.43-7.37 (m, 3H), 6.65 (d, *J* = 8.4 Hz, 2H), 4.68-4.63 (m, 1H), 4.48 (s, 2H), 3.78 (s, 3H), 3.73 (d, *J* = 10.4 Hz, 2H), 3.01 (t, *J* = 12.0 Hz, 2H), 2.94 (t, *J* = 12.8 Hz, 2H), 1.98 (d, *J* = 12.0 Hz, 2H); MS(*m/z*): [M+H] calc'd for C<sub>20</sub>H<sub>23</sub>ClN<sub>3</sub>O<sub>2</sub> is 372.14, found 372.11; HPLC *t*<sub>R</sub> = 3.60 min.

**5-(Trifluoromethoxy)-1-(1-(2-chlorobenzyl)piperidin-4-yl)-1H-benzo[d]imidazol-2(3H)-one, (37)**

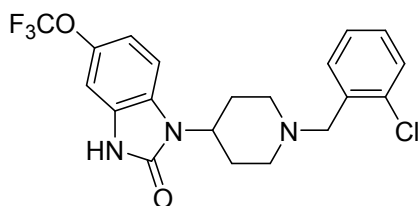

This compound was prepared according to the procedure for compound **29** in 83% yield from 4-(trifluoromethoxy)-*N*<sup>1</sup>-(1-(2-chlorobenzyl)piperidin-4-yl)benzene-1,2-diamine. <sup>1</sup>H NMR (400 MHz, CDCl<sub>3</sub>) δ 9.62 (s, 1H), 7.78 (t, *J* = 4.8 Hz, 1H), 7.52-7.40 (m, 4H), 6.98 (s, 1H), 4.73-4.68 (m, 1H), 4.50 (s, 2H), 3.75 (d, *J* = 11.2 Hz, 2H), 3.03 (t, *J* = 12.4 Hz, 2H), 2.91 (q, *J* = 12.0 Hz, 2H), 2.00 (d, *J* = 11.6 Hz, 2H); MS(*m/z*): [M+H] calc'd for C<sub>20</sub>H<sub>20</sub>ClF<sub>3</sub>N<sub>3</sub>O<sub>2</sub> is 426.11, found 426.13; HPLC *t*<sub>R</sub> = 4.00 min.

**5-(Methylsulfonyl)-1-(1-(2-chlorobenzyl)piperidin-4-yl)-1H-benzo[d]imidazol-2(3H)-one, (38)**

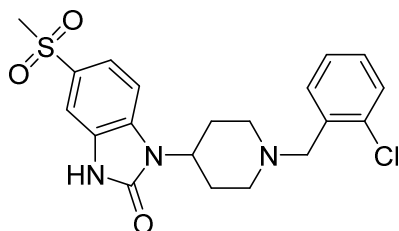

This compound was prepared according to the procedure for compound **29** in 75% yield from 4-(methylsulfonyl)-*N*<sup>1</sup>-(1-(2-chlorobenzyl)piperidin-4-yl)benzene-1,2-diamine. <sup>1</sup>H NMR (400 MHz, CDCl<sub>3</sub>) δ 9.24 (s, 1H), 8.03 (t, *J* = 8.8 Hz, 2H), 7.77 (dd, *J* = 8.4, 1.2 Hz, 1H), 7.70 (d, *J* = 1.6 Hz, 1H), 7.51-7.43 (m, 3H), 4.82-4.75 (m, 1H), 4.48 (s, 2H), 3.73 (d, *J* = 11.6 Hz, 2H), 3.19 (t, *J* = 13.6 Hz, 2H), 3.09 (q, *J* = 11.4 Hz, 2H), 3.04 (s, 3H), 2.03 (d, *J* = 12.0 Hz, 2H); MS(*m/z*): [M+H] calc'd for C<sub>20</sub>H<sub>23</sub>ClN<sub>3</sub>O<sub>3</sub>S is 420.11, found 420.12; HPLC *t*<sub>R</sub> = 3.28 min.

**1-(1-(2-Chlorobenzyl)piperidin-4-yl)-2-oxo-2,3-dihydro-1H-benzo[d]imidazole-5-carbonitrile, (39)**

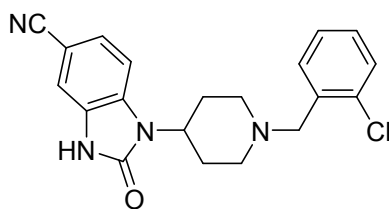

This compound was prepared according to the procedure for compound **29** in 70% yield from 3-amino-4-((1-(2-chlorobenzyl)piperidin-4-yl)amino)benzonitrile. <sup>1</sup>H NMR (400 MHz, CDCl<sub>3</sub>) δ 9.76 (s, 1H), 7.52 (d, *J* = 3.6 Hz, 1H), 7.42-7.36 (m, 4H), 7.30-7.22 (m, 2H), 4.41-4.35 (m, 1H), 4.38 (s, 2H), 3.10 (d, *J* = 7.2 Hz, 2H), 2.44 (t, *J* = 10.0 Hz, 2H), 2.32 (t, *J* = 10.8 Hz, 2H), 1.83 (d, *J* = 10.8 Hz, 2H); MS(*m/z*): [M+H] calc'd for C<sub>20</sub>H<sub>20</sub>ClN<sub>4</sub>O is 367.12, found 367.14; HPLC *t*<sub>R</sub> = 3.50 min.

**4-Chloro-1-(1-(4-bromo-2-fluorobenzyl)piperidin-4-yl)-1H-benzo[d]imidazol-2(3H)-one, (40)<sup>8</sup>**

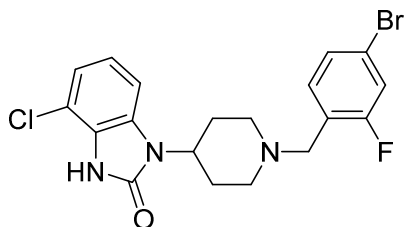

This compound was prepared according to the procedure for compound **17** in 35% yield from 4-chloro-1-(piperidin-4-yl)-1H-benzo[d]imidazol-2(3H)-one. Methane sulfonic acid (4.0  $\mu$ L, 0.06 mmol) was added to a suspension of **40** in EtOH (1 mL). The mixture was heated to 60  $^{\circ}$ C for 30 min. The solvent was removed under reduced pressure and the residue was dissolved in 1:1 water/acetonitrile. The solution was frozen and then subjected to lyophilization overnight giving product **40** in the form of a mesylate salt.  $^1$ H NMR mesylate (400 MHz, CD<sub>3</sub>OD)  $\delta$  7.61 (dd,  $J$  = 9.2, 1.2 Hz, 1H), 7.57 (dd,  $J$  = 3.8, 1.4 Hz, 2H), 7.20 (dd,  $J$  = 6.0, 2.8 Hz, 1H), 7.09-7.07 (m, 2H), 4.54 (tt,  $J$  = 12.2, 4.2 Hz, 1H), 4.45 (s, 2H), 3.71 (d,  $J$  = 12.8 Hz, 2H), 3.36-3.30 (m, 2H), 2.80 (qd,  $J$  = 3.4 Hz, 2H), 2.71 (s, 3H), 2.10 (d,  $J$  = 12.4 Hz, 2H); MS( $m/z$ ): [M+H] calc'd for C<sub>19</sub>H<sub>19</sub>BrClFN<sub>3</sub>O is 438.03, found 437.99; HPLC  $t_R$  = 4.01 min.

**5-Chloro-1-(1-(4-bromo-2-fluorobenzyl)piperidin-4-yl)-1H-benzo[d]imidazol-2(3H)-one, (41)<sup>8</sup>**

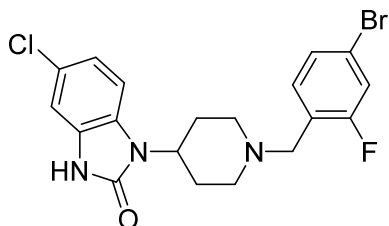

This compound was prepared according to the procedure for compound **2** in 63% yield from 5-chloro-1-(piperidin-4-yl)-1H-benzo[d]imidazol-2(3H)-one. Methane sulfonic acid (65  $\mu$ L, 1.0 mmol) was added to a suspension of **41** in EtOH (1 mL). The

mixture was heated to 60 °C for 30 min. The solvent was removed under reduced pressure and the residue was dissolved in 1:1 water/acetonitrile. The solution was frozen and then subjected to lyophilization overnight giving product **41** in the form of a mesylate salt. <sup>1</sup>H NMR mesylate (400 MHz, CD<sub>3</sub>OD) δ 7.61 (dd, *J* = 8.8, 0.8 Hz, 1H), 7.57 (dd, *J* = 3.8, 1.4 Hz, 2H), 7.23 (dd, *J* = 7.6, 1.2 Hz, 1H), 7.10 (d, *J* = 2.0 Hz, 1H), 7.08 (d, *J* = 1.2 Hz, 1H), 4.53 (tt, *J* = 12.4, 4.0 Hz, 1H), 4.45 (s, 2H), 3.70 (d, *J* = 12.8 Hz, 2H), 3.36-3.29 (m, 2H), 2.79 (qd, *J* = 13.0, 3.4 Hz, 2H), 2.72 (s, 3H), 2.09 (d, *J* = 14.0 Hz, 2H); MS(*m/z*): [M+H] calc'd for C<sub>19</sub>H<sub>19</sub>BrClFN<sub>3</sub>O is 438.03, found 438.11; HPLC *t*<sub>R</sub> = 3.66 min.

**6-Chloro-1-(1-(4-bromo-2-fluorobenzyl)piperidin-4-yl)-1*H*-benzo[*d*]imidazol-2(3*H*)-one, (42)<sup>8</sup>**

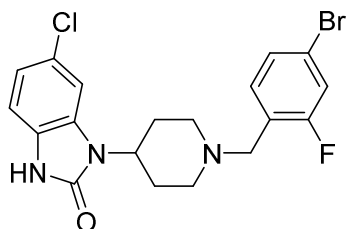

This compound was prepared according to the procedure for compound **17** in 32% yield from 6-chloro-1-(piperidin-4-yl)-1*H*-benzo[*d*]imidazol-2(3*H*)-one. Methane sulfonic acid (6.0 μL, 0.1 mmol) was added to a suspension of **42** in EtOH (1 mL). The mixture was heated to 60 °C for 30 min. The solvent was removed under reduced pressure and the residue was dissolved in 1:1 water/acetonitrile. The solution was frozen and then subjected to lyophilization overnight giving product **42** in the form of a mesylate salt. <sup>1</sup>H NMR mesylate (400 MHz, CD<sub>3</sub>OD) δ 7.61 (dd, *J* = 10.0, 1.2 Hz, 1H), 7.57 (dd, *J* = 3.6, 1.2 Hz, 2H), 7.36 (d, *J* = 2.0 Hz, 1H), 7.08 (dd, *J* = 8.4, 2.0 Hz, 1H), 7.02 (d, *J* = 8.0 Hz, 1H), 4.55 (tt, *J* = 12.4, 4.0 Hz, 1H), 4.45 (s, 2H), 3.71 (d, *J* = 12.4 Hz, 2H), 3.36-3.32 (m, 2H), 2.77 (qd, *J* = 13.0,

3.6 Hz, 2H), 2.72 (s, 3H), 2.10 (d,  $J = 14.8$  Hz, 2H); MS( $m/z$ ):  $[M+H]$  calc'd for  $C_{19}H_{19}BrClFN_3O$  is 438.03, found 437.96; HPLC  $t_R = 4.08$  min.

**4,6-Dichloro-1-(1-(4-bromo-2-fluorobenzyl)piperidin-4-yl)-1H-benzo[d]imidazol-2(3H)-one, (43)**

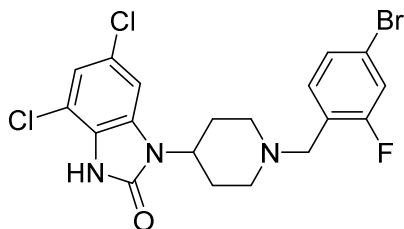

This compound was prepared according to the procedure for compound **17** in 68% yield from 4,6-dichloro-1-(piperidin-4-yl)-1H-benzo[d]imidazol-2(3H)-one. A solution of methane sulfonic acid in EtOH (0.06 M, 1.0 mL, 0.06 mmol) was added to **43**. The solvent was removed under reduced pressure and the residue was dissolved in 1:1 water/acetonitrile. The solution was frozen and then subjected to lyophilization overnight giving product **43** in the form of a mesylate salt.  $^1H$  NMR mesylate (400 MHz,  $CD_3OD$ )  $\delta$  7.59-7.54 (m, 3H), 7.34 (d,  $J = 1.6$  Hz, 1H), 7.13 (d,  $J = 5.0$  Hz, 1H), 4.50 (tt,  $J = 12.4, 4.0$  Hz, 1H), 4.36 (s, 2H), 3.62 (d,  $J = 12.4$  Hz, 2H), 3.20 (t,  $J = 12.4$  Hz, 2H), 2.79-2.72 (m, 5H), 2.05 (d,  $J = 12.4$  Hz, 2H); MS( $m/z$ ):  $[M + H]$  calc'd for  $C_{19}H_{18}BrCl_2FN_3O$  is 471.99, found 472.10; HPLC  $t_R = 3.76$  min.

**5,6-Dichloro-1-(1-(4-bromo-2-fluorobenzyl)piperidin-4-yl)-1H-benzo[d]imidazol-2(3H)-one, (44)<sup>8</sup>**

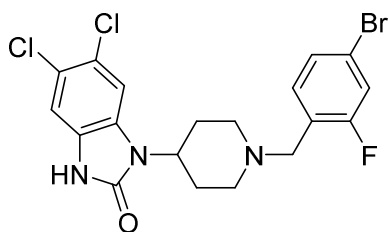

This compound was prepared according to the procedure for compound **2** in 31% yield from 5,6-dichloro-1-(piperidin-4-yl)-1H-benzo[d]imidazol-2(3H)-one.

one. Methane sulfonic acid (13  $\mu$ L, 0.2 mmol) was added to a suspension of **44** in EtOH (1 mL). The mixture was heated to 60  $^{\circ}$ C for 30 min. The solvent was removed under reduced pressure and the residue was dissolved in 1:1 water/acetonitrile. The solution was frozen and then subjected to lyophilization overnight giving product **44** in the form of a mesylate salt.  $^1$ H NMR mesylate (400 MHz, CD<sub>3</sub>OD)  $\delta$  7.61 (dd,  $J$  = 9.0, 1.4 Hz, 1H), 7.56 (dd,  $J$  = 4.0, 2.0 Hz, 2H), 7.47 (s, 1H), 7.20 (s, 1H), 4.53 (tt,  $J$  = 12.4, 4.0 Hz, 1H), 4.45 (s, 2H), 3.70 (d,  $J$  = 12.8 Hz, 2H), 3.35-3.28 (m, 2H), 2.81-2.71 (m, 5H), 2.09 (d,  $J$  = 14.4 Hz, 2H); MS( $m/z$ ): [M+H] calc'd for C<sub>19</sub>H<sub>18</sub>BrCl<sub>2</sub>FN<sub>3</sub>O is 471.99, found 472.18; HPLC  $t_R$  = 4.00 min.

**4,5,7-Trichloro-1-(1-(4-bromo-2-fluorobenzyl)piperidin-4-yl)-1H-benzo[d]imidazol-2(3H)-one, (45)**

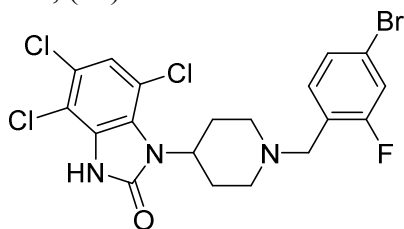

This compound was prepared according to the procedure for compound **17** in 34% yield from 4,5,7-trichloro-1-(piperidin-4-yl)-1H-benzo[d]imidazol-2(3H)-one. A solution of methane sulfonic acid in EtOH (0.06 M, 1.0 mL, 0.06 mmol) was added to **45**. The solvent was removed under reduced pressure and the residue was dissolved in 1:1 water/acetonitrile. The solution was frozen and then subjected to lyophilization overnight giving product **45** in the form of a mesylate salt.  $^1$ H NMR mesylate (400 MHz, CD<sub>3</sub>OD)  $\delta$  7.57-7.53 (m, 3H), 7.42 (s, 1H), 4.36 (s, 2H), 3.79 (tt,  $J$  = 11.4, 4.4 Hz, 1H), 3.57 (d,  $J$  = 12.8 Hz, 2H), 3.14 (td,  $J$  = 13.0, 2.2 Hz, 2H), 2.72 (s, 3H), 2.20 (d,  $J$  = 14.4 Hz, 2H), 1.87 (qd,  $J$  = 13.8, 3.6 Hz, 2H); MS( $m/z$ ): [M + H] calc'd for C<sub>19</sub>H<sub>17</sub>BrCl<sub>3</sub>FN<sub>3</sub>O is 505.95, found 505.77; HPLC  $t_R$  = 4.51 min.

**5,6-Dichloro-1-(1-(4-bromobenzyl)piperidin-4-yl)-1*H*-benzo[*d*]imidazol-2(3*H*)-one, (46)<sup>2,8</sup>**

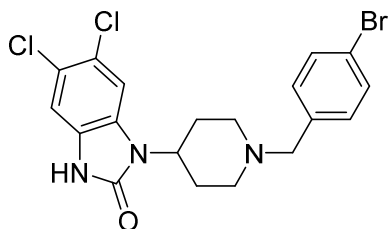

This compound was prepared according to the procedure for compound **17** in 42% yield from 5,6-dichloro-1-(piperidin-4-yl)-1*H*-benzo[*d*]imidazol-2(3*H*)-one. Methane sulfonic acid (13  $\mu$ L, 0.2 mmol) was added to a suspension of **46** in EtOH (1 mL). The mixture was heated to 60  $^{\circ}$ C for 30 min. The solvent was removed under reduced pressure and the residue was dissolved in 1:1 water/acetonitrile. The solution was frozen and then subjected to lyophilization overnight giving product **46** in the form of a mesylate salt.  $^1$ H NMR mesylate (400 MHz, CD<sub>3</sub>OD)  $\delta$  7.71 (dd,  $J$  = 6.6, 1.6 Hz, 2H), 7.50 (dd,  $J$  = 6.6, 1.6 Hz, 2H), 7.48 (s, 1H), 7.19 (s, 1H), 4.52 (tt,  $J$  = 12.4, 4.0 Hz, 1H), 4.37 (s, 2H), 3.63 (d,  $J$  = 12.8 Hz, 2H), 3.25 (td,  $J$  = 13.0, 2.4 Hz, 2H), 2.80-2.69 (m, 5H), 2.08 (d,  $J$  = 14.8 Hz, 2H); MS( $m/z$ ): [M + H] calc'd for C<sub>19</sub>H<sub>19</sub>BrCl<sub>2</sub>N<sub>3</sub>O is 454.00, found 454.23; HPLC  $t_R$  = 3.76 min.

**5,6-Dichloro-1-(1-(4-bromobenzyl)azepan-4-yl)-1*H*-benzo[*d*]imidazol-2(3*H*)-one, (47)**



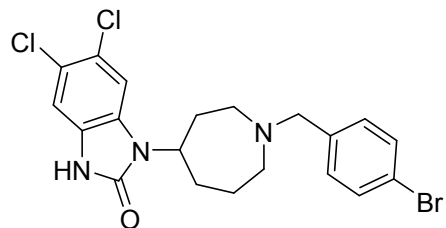

This compound was prepared according to the procedure for compound **4** in 71% yield from 5,6-dichloro-1-(azepan-4-yl)-1H-benzo[d]imidazol-2(3H)-one. A solution of methane sulfonic acid in EtOH (0.06 M, 1.0 mL, 0.06 mmol) was added to **47**. The solvent was removed under reduced pressure and the residue was dissolved in 1:1 water/acetonitrile. The solution was frozen and then subjected to lyophilization overnight giving product **47** in the form of a mesylate salt. <sup>1</sup>H NMR mesylate (400 MHz, CD<sub>3</sub>OD) δ 7.67 (d, *J* = 1.6 Hz, 2H), 7.49 (t, *J* = 8.0 Hz, 3H), 7.19 (s, 1H), 4.58-4.51 (m, 1H), 4.40 (s, 2H), 3.66-3.61 (m, 1H), 3.43 (m, 3H), 2.78-2.70 (m, 4H), 2.38-2.30 (m, 1H), 2.23-2.09 (m, 3H), 2.04-2.02 (m, 1H); MS(*m/z*): [M+H] calc'd for C<sub>20</sub>H<sub>21</sub>BrCl<sub>2</sub>N<sub>3</sub>O is 468.02, found 468.05; HPLC *t*<sub>R</sub> = 3.87 min.

**(R)-5,6-dichloro-1-(1-(4-bromobenzyl)pyrrolidin-3-yl)-1H-benzo[d]imidazol-2(3H)-one, (48)**

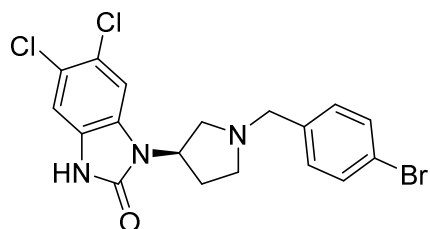

This compound was prepared according to the procedure for compound **9** in 62% yield from (*R*)-5,6-dichloro-1-(pyrrolidin-3-yl)-1H-benzo[d]imidazol-2(3H)-one. <sup>1</sup>H NMR (400 MHz, CDCl<sub>3</sub>) δ 8.48 (s, 1H), 8.19 (s, 1H), 7.47 (d, *J* = 8.4 Hz, 2H), 7.30 (d, *J* = 8.0 Hz, 2H), 7.12 (s, 1H), 5.16-5.12 (m, 1H), 3.76 (d, *J* = 12.8 Hz, 1H), 3.50 (d, *J* = 12.8 Hz, 1H), 3.24 (t, *J* = 8.0 Hz, 1H), 2.96 (d, *J* = 10.0 Hz, 1H), 2.51 (t, *J* =

10.0 Hz, 1H), 2.37-2.25 (m, 2H), 2.04 (t,  $J = 9.8$  Hz, 1H); MS( $m/z$ ): [M+H] calc'd for  $C_{18}H_{17}BrCl_2N_3O$  is 439.99, found 439.96; HPLC  $t_R = 4.26$  min.

**(S)-5,6-dichloro-1-(1-(4-bromobenzyl)pyrrolidin-3-yl)-1H-benzo[d]imidazol-2(3H)-one, (49)**

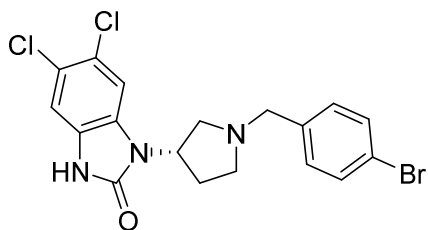

This compound was prepared according to the procedure for compound **9** in 61% yield from (S)-5,6-dichloro-1-(pyrrolidin-3-yl)-1H-benzo[d]imidazol-2(3H)-one.  $^1H$  NMR (400 MHz,  $CDCl_3$ )  $\delta$  9.58 (s, 1H), 8.19 (s, 1H), 7.47 (d,  $J = 8.4$  Hz, 2H), 7.30 (d,  $J = 8.4$  Hz, 2H), 7.15 (s, 1H), 5.15 (tt,  $J = 10.4, 3.6$  Hz, 1H), 3.76 (d,  $J = 12.8$  Hz, 1H), 3.51 (d,  $J = 12.8$  Hz, 1H), 3.25 (t,  $J = 12.4$  Hz, 1H), 2.96 (d,  $J = 10.4$  Hz, 1H), 2.52 (t,  $J = 9.6$  Hz, 1H), 2.37-2.26 (m, 2H), 2.08-1.98 (m, 1H); MS( $m/z$ ): [M+H] calc'd for  $C_{18}H_{16}BrCl_2N_3O$  is 439.99, found 439.99; HPLC  $t_R = 3.29$  min.

**(R)-1-(1-(4-bromobenzyl)piperidin-3-yl)-5,6-dichloro-1H-benzo[d]imidazol-2(3H)-one, (50)**

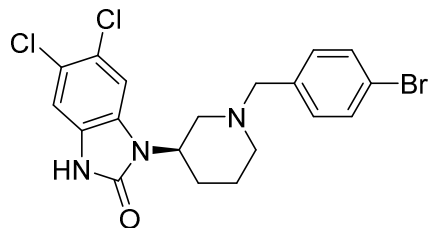

This compound was prepared according to the procedure for compound **9** in 36% yield from (*R*)-5,6-dichloro-1-(piperidin-3-yl)-1*H*-benzo[*d*]imidazol-2(3*H*)-one. <sup>1</sup>H NMR (400 MHz, CD<sub>3</sub>OD) δ 7.47 (d, *J* = 8.4 Hz, 2H), 7.44 (s, 1H), 7.28 (d, *J* = 8.4 Hz, 2H), 7.16 (s, 1H), 4.38 (tt, *J* = 11.6, 4.0 Hz, 1H), 3.59 (s, 2H), 2.90 (d, *J* = 11.2 Hz, 2H), 2.74 (t, *J* = 10.6 Hz, 1H), 2.26-2.16 (m, 2H), 1.87 (dd, *J* = 11.6, 2.2 Hz, 2H), 1.79-1.78 (m, 1H); MS(*m/z*): [M+H] calc'd for C<sub>19</sub>H<sub>19</sub>BrCl<sub>2</sub>N<sub>3</sub>O is 454.00, found 454.04; HPLC *t*<sub>R</sub> = 4.24 min.

**(*S*)-1-(1-(4-bromobenzyl)piperidin-3-yl)-5,6-dichloro-1*H*-benzo[*d*]imidazol-2(3*H*)-one, (51)**

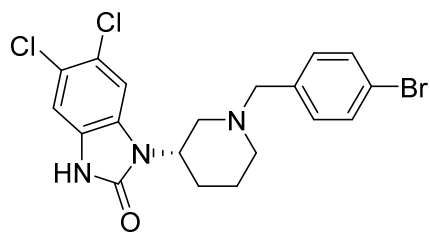

This compound was prepared according to the procedure for compound **9** in 42% yield from (*S*)-5,6-dichloro-1-(piperidin-3-yl)-1*H*-benzo[*d*]imidazol-2(3*H*)-one. <sup>1</sup>H NMR (400 MHz, CD<sub>3</sub>OD) δ 7.47 (d, *J* = 8.4 Hz, 2H), 7.43 (s, 1H), 7.28 (d, *J* = 8.4 Hz, 2H), 7.16 (s, 1H), 4.38 (tt, *J* = 12.0, 3.8 Hz, 1H), 3.59 (s, 2H), 2.90 (d, *J* = 11.6 Hz, 2H), 2.74 (t, *J* = 11.0 Hz, 1H), 2.26-2.12 (m, 2H), 1.87 (dd, *J* = 12.2, 2.2 Hz, 2H), 1.79-1.69 (m, 1H); MS(*m/z*): [M+H] calc'd for C<sub>19</sub>H<sub>19</sub>BrCl<sub>2</sub>N<sub>3</sub>O is 454.00, found 454.00; HPLC *t*<sub>R</sub> = 4.14 min.



<sup>1</sup>H NMR of (26)

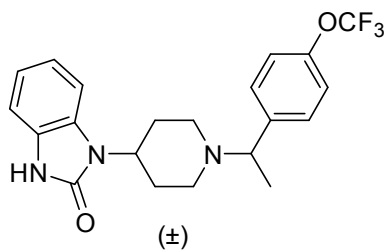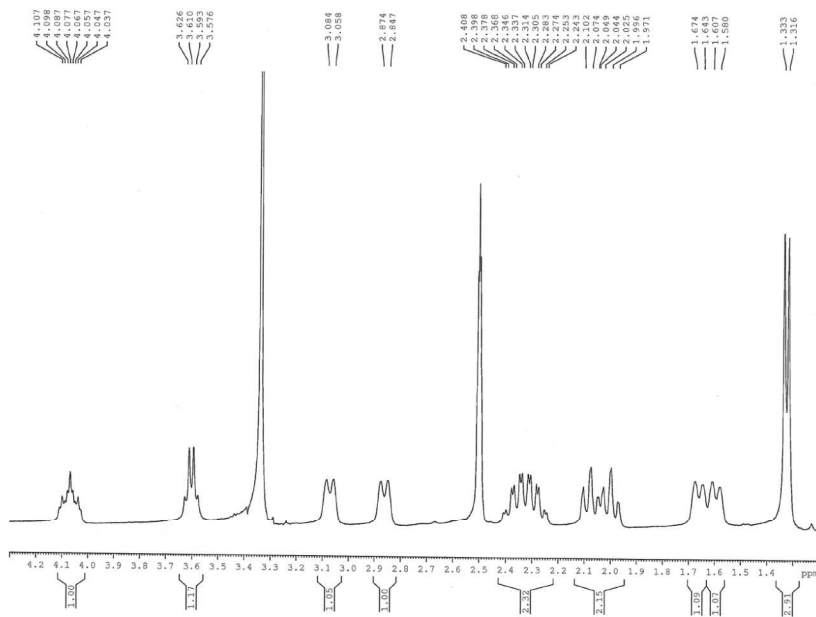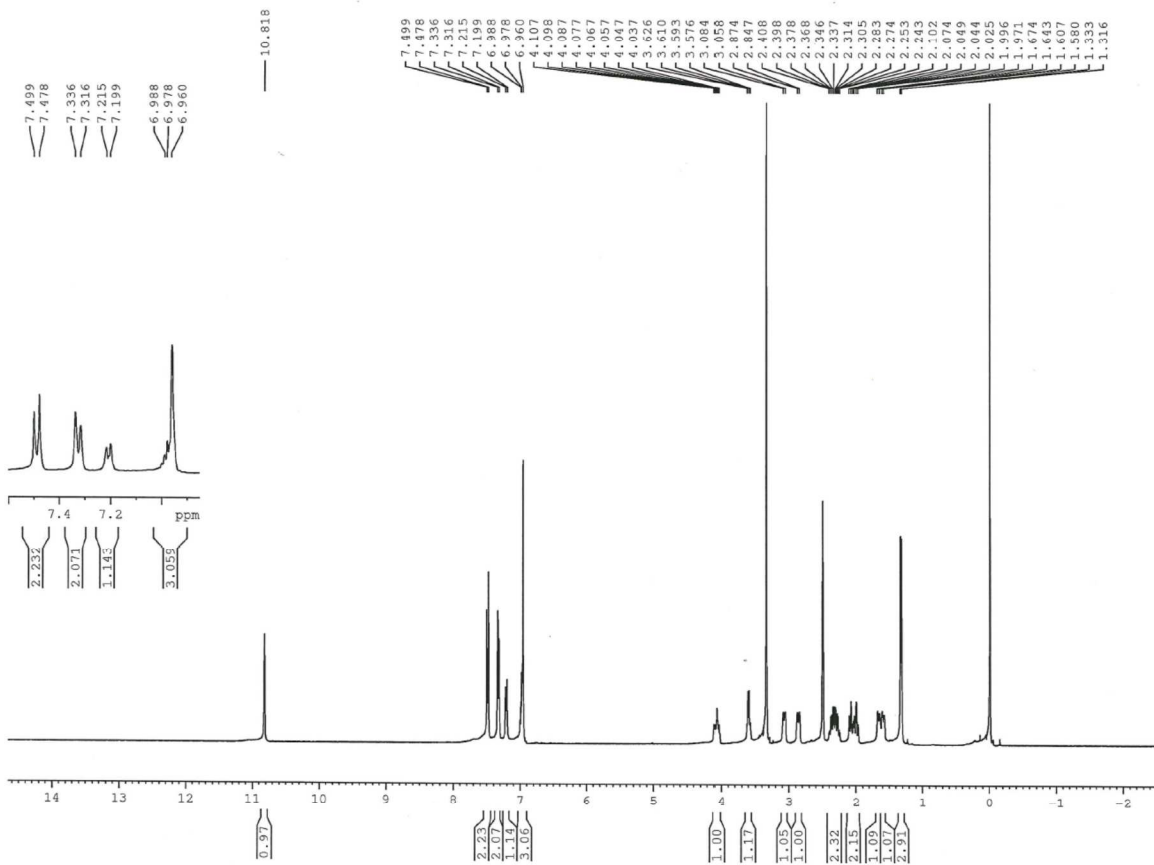

<sup>1</sup>H NMR of (29)

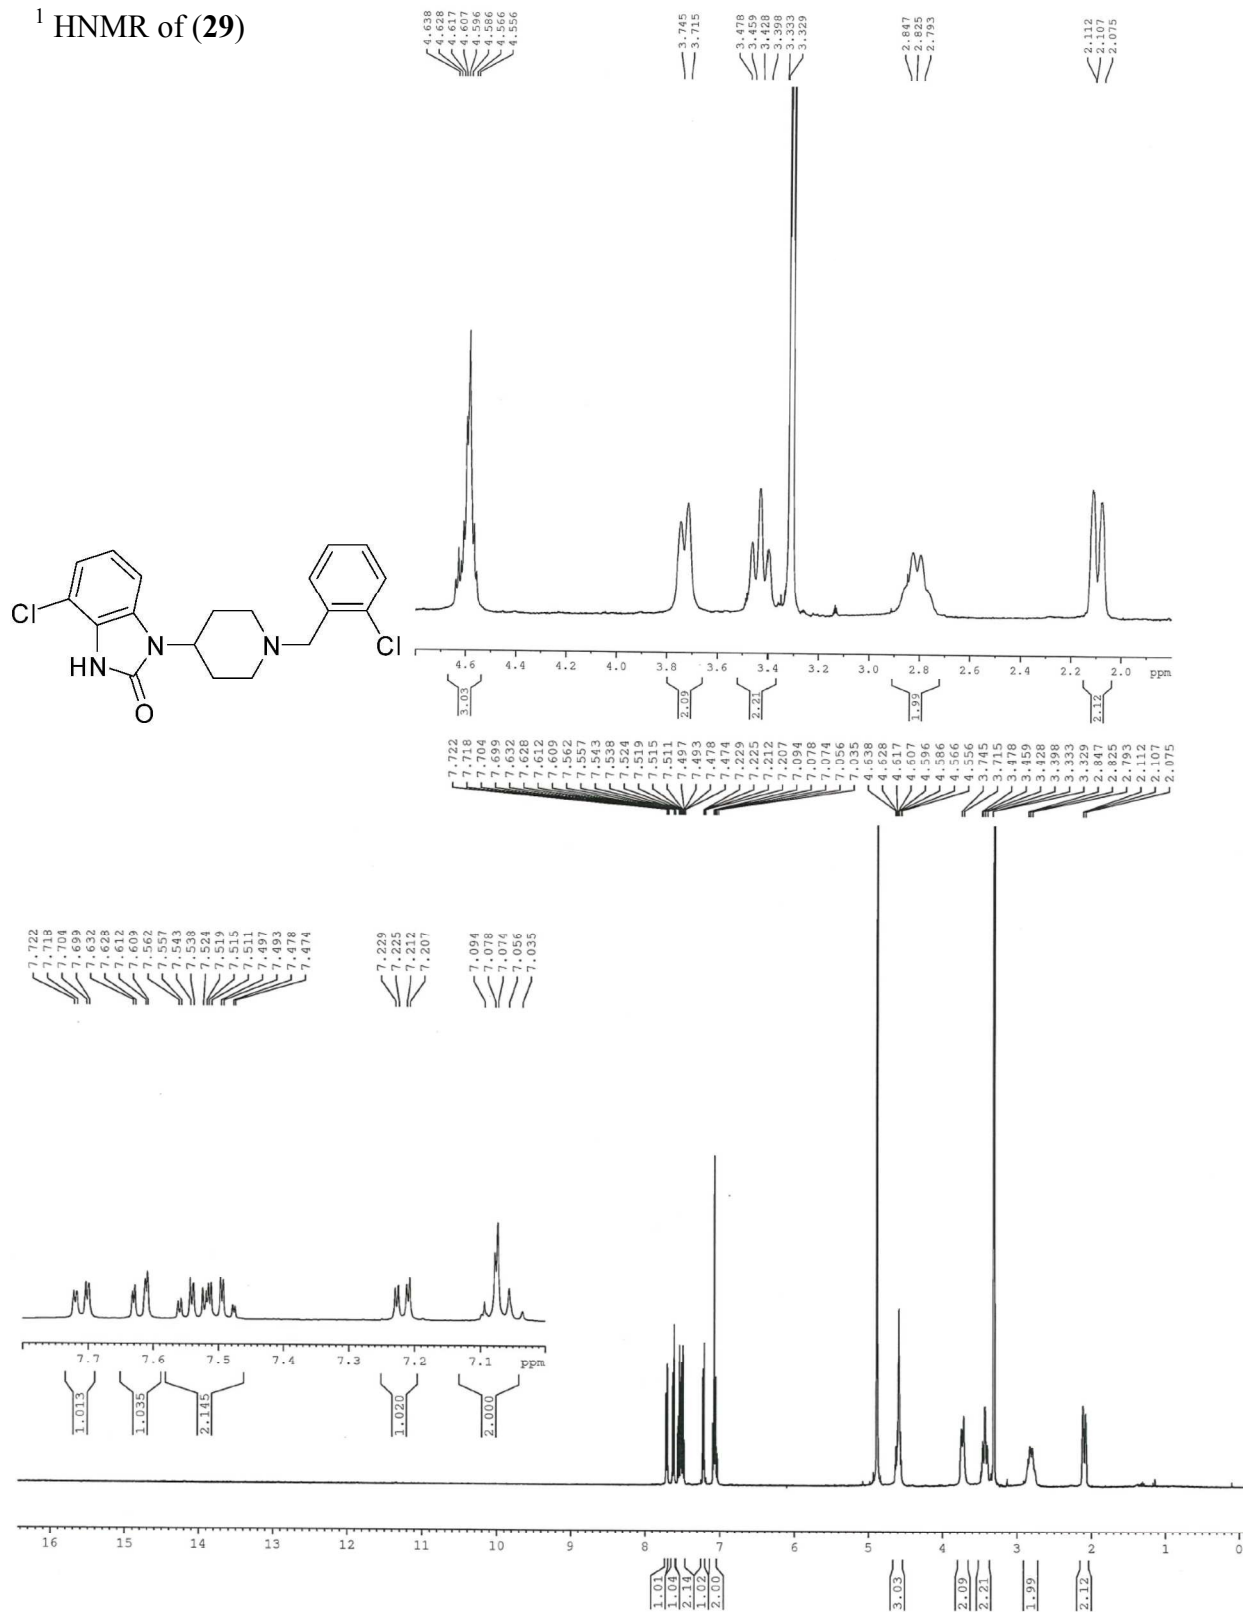

<sup>1</sup>H NMR of (30)

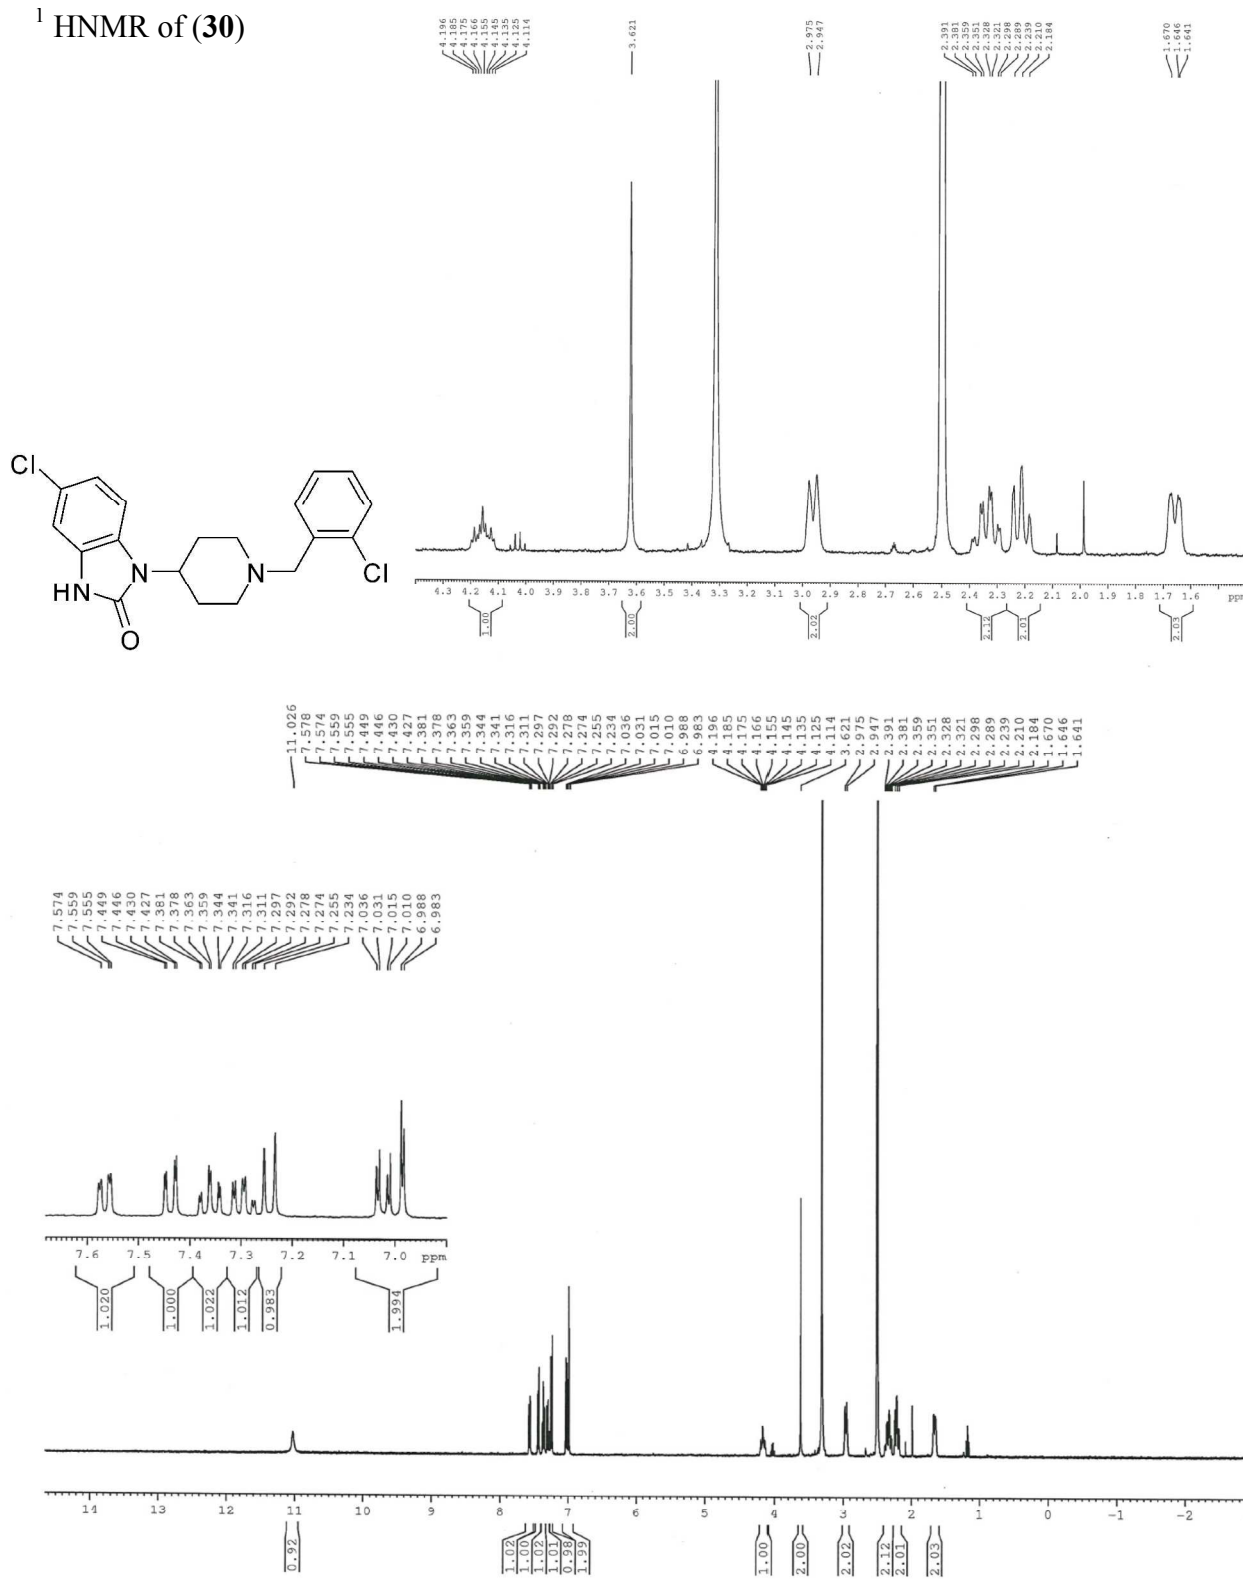

<sup>1</sup>H NMR of (31)

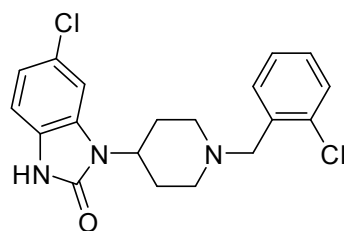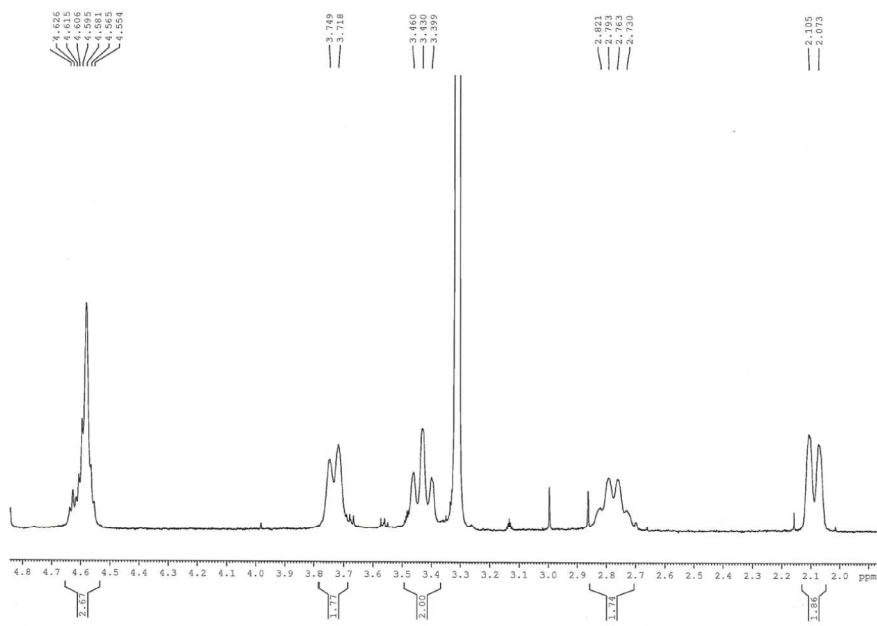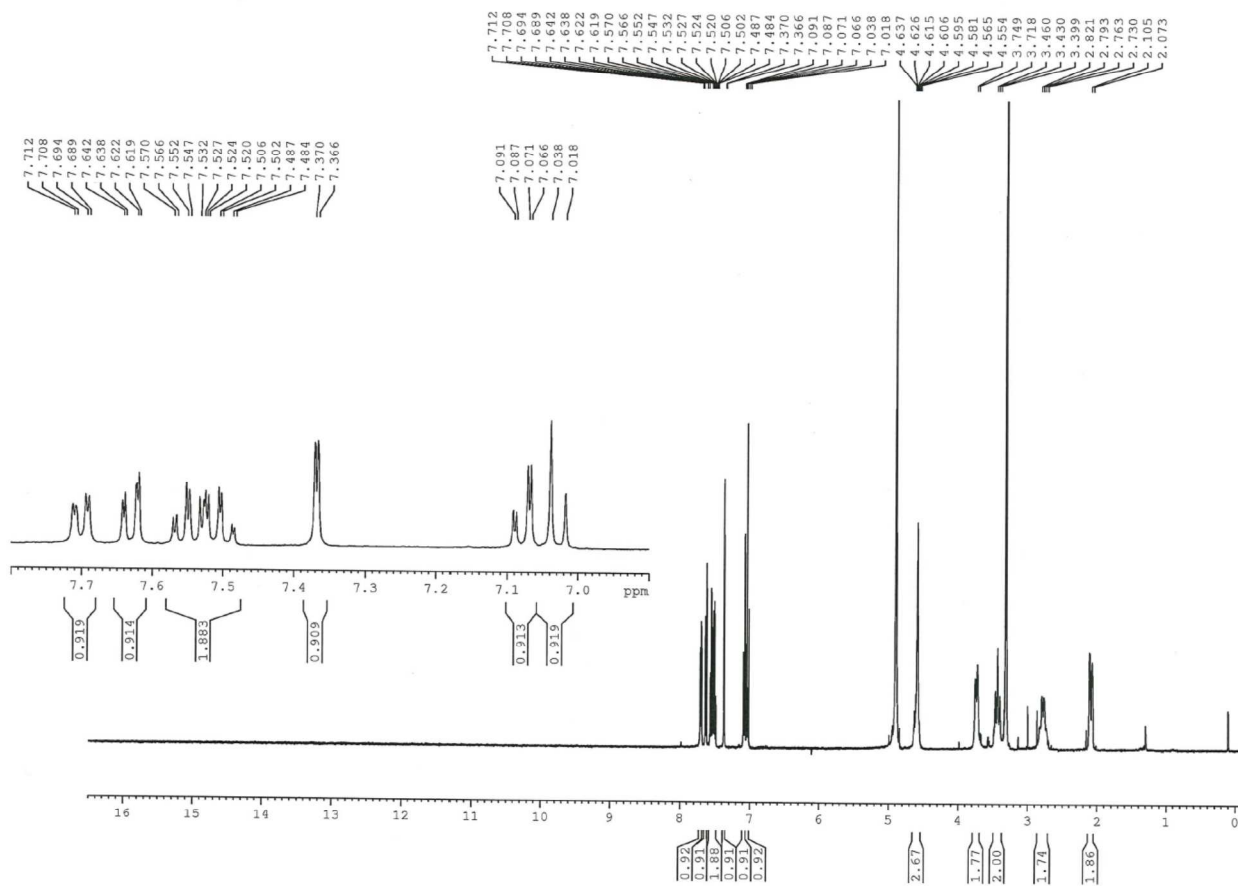



<sup>1</sup>H NMR of (41)

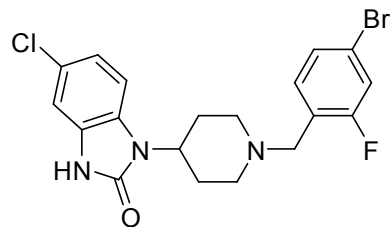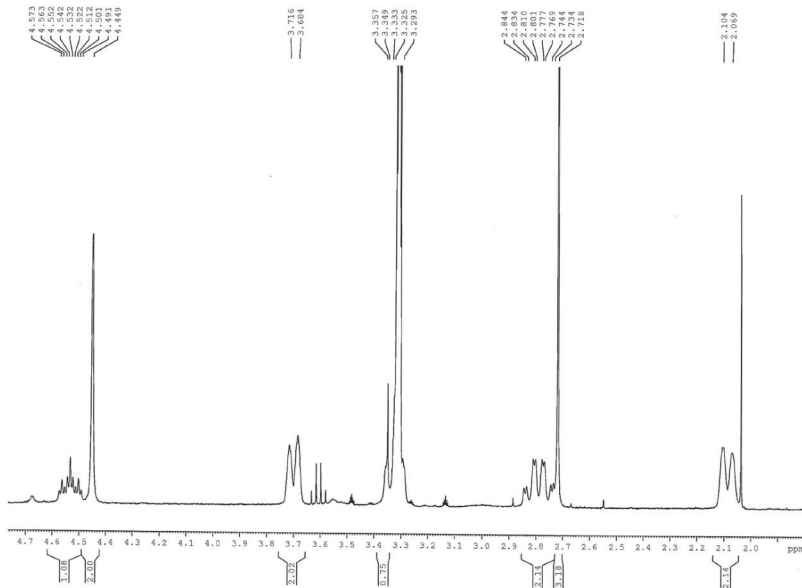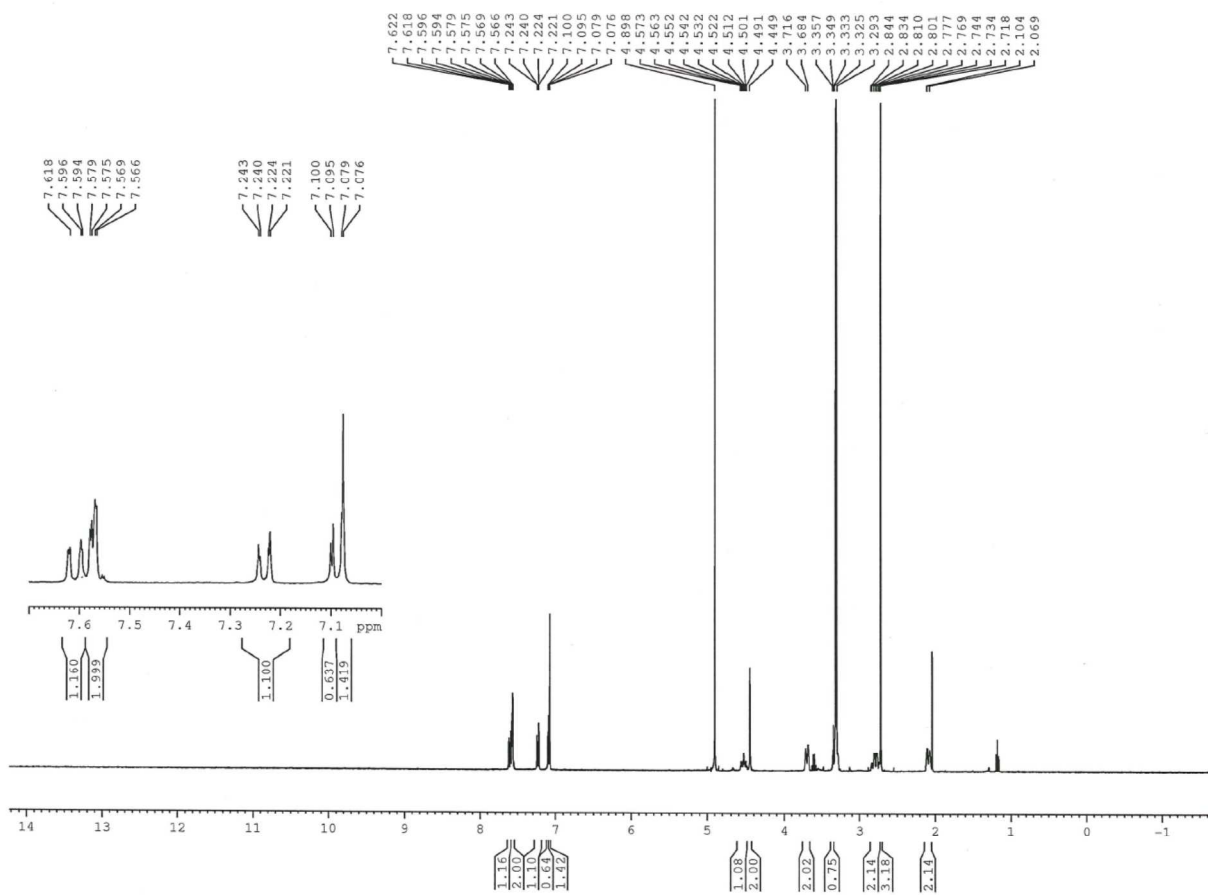





## Molecular Strings

| Compound | Smiles                                                             |
|----------|--------------------------------------------------------------------|
| 1        | <chem>O=C1NC2=C(C=CC=C2)N1C3CCN(CC4=CC=CC=C4)CC3</chem>            |
| 2        | <chem>O=C1NC2=C(C=CC=C2)N1C3CCN(CC4=C(Cl)C=CC=C4)CC3</chem>        |
| 3        | <chem>O=C1NC2=C(C=CC=C2)N1C3CCN(CC4=CC(Cl)=CC=C4)CC3</chem>        |
| 4        | <chem>O=C1NC2=C(C=CC=C2)N1C3CCN(CC4=CC=C(Cl)C=C4)CC3</chem>        |
| 5        | <chem>O=C1NC2=C(C=CC=C2)N1C3CCN(CC4=CC=C(C)C=C4)CC3</chem>         |
| 6        | <chem>O=C1NC2=C(C=CC=C2)N1C3CCN(CC4=CC=C(Br)C=C4)CC3</chem>        |
| 7        | <chem>O=C1NC2=C(C=CC=C2)N1C3CCN(CC4=CC=C(OC)C=C4)CC3</chem>        |
| 8        | <chem>O=C1NC2=C(C=CC=C2)N1C3CCN(CC4=CC=C(NC(C)=O)C=C4)CC3</chem>   |
| 9        | <chem>O=C1NC2=C(C=CC=C2)N1C3CCN(CC4=CC=C(C#N)C=C4)CC3</chem>       |
| 10       | <chem>O=C1NC2=C(C=CC=C2)N1C3CCN(CC4=CC=C(C(N)=O)C=C4)CC3</chem>    |
| 11       | <chem>O=C1NC2=C(C=CC=C2)N1C3CCN(CC4=CC(OC)=CC=C4)CC3</chem>        |
| 12       | <chem>O=C1NC2=C(C=CC=C2)N1C3CCN(CC4=CC(OC(F)(F)F)=CC=C4)CC3</chem> |
| 13       | <chem>O=C1NC2=C(C=CC=C2)N1C3CCN(CC4=CC(Cl)=C(Cl)C=C4)CC3</chem>    |
| 14       | <chem>O=C1NC2=C(C=CC=C2)N1C3CCN(CC4=C(C)C=C(Cl)C=C4)CC3</chem>     |
| 15       | <chem>O=C1NC2=C(C=CC=C2)N1C3CCN(CC4=C(F)C=C(Br)C=C4)CC3</chem>     |
| 16       | <chem>O=C1NC2=C(C=CC=C2)N1C3CCN(C(C)C4=CC=CC=C4)CC3</chem>         |
| 17       | <chem>O=C1NC2=C(C=CC=C2)N1C3CCN(C(C)C4=C(Cl)C=CC=C4)CC3</chem>     |
| 18       | <chem>O=C1NC2=C(C=CC=C2)N1C3CCN(C(C)C4=CC=C(Cl)C=C4)CC3</chem>     |
| 19       | <chem>O=C1NC2=C(C=CC=C2)N1C3CCN(C(CC)C4=CC=C(Cl)C=C4)CC3</chem>    |
| 20       | <chem>O=C1NC2=C(C=CC=C2)N1C3CCN(C(C)C4=CC=C(F)C=C4)CC3</chem>      |
| 21       | <chem>O=C1NC2=C(C=CC=C2)N1C3CCN(C(C)C4=CC=C(Br)C=C4)CC3</chem>     |
| 22       | <chem>O=C1NC2=C(C=CC=C2)N1C3CCN(C(C)C4=CC=C(OC)C=C4)CC3</chem>     |
| 23       | <chem>O=C1NC2=C(C=CC=C2)N1C3CCN(C(C)C4=CC=C(OCC)C=C4)CC3</chem>    |
| 24       | <chem>O=C1NC2=C(C=CC=C2)N1C3CCN(C(C)C4=CC=C(OC(C)C)C=C4)CC3</chem> |
| 25       | <chem>O=C1NC2=C(C=CC=C2)N1C3CCN(C(C)C4=CC(OCCO5)=C5C=C4)CC3</chem> |

|    |                                                                          |
|----|--------------------------------------------------------------------------|
| 26 | <chem>O=C1NC2=C(C=CC=C2)N1C3CCN(C(C)C4=CC=C(OC(F)(F)F)C=C4)CC3</chem>    |
| 27 | <chem>O=C1NC2=C(C=CC=C2)N1C3CCN(C(C)C4=C(F)C=C(Br)C=C4)CC3</chem>        |
| 28 | <chem>O=C1NC2=C(C=CC=C2)N1C3CCN(C(C)C4=C(F)C=C(Cl)C=C4)CC3</chem>        |
| 29 | <chem>O=C1NC2=C(C=CC=C2Cl)N1C3CCN(CC4=C(Cl)C=CC=C4)CC3</chem>            |
| 30 | <chem>O=C1NC2=C(C=CC(Cl)=C2)N1C3CCN(CC4=C(Cl)C=CC=C4)CC3</chem>          |
| 31 | <chem>O=C1NC2=C(C=C(Cl)C=C2)N1C3CCN(CC4=C(Cl)C=CC=C4)CC3</chem>          |
| 32 | <chem>O=C1NC2=C(C(Cl)=CC=C2)N1C3CCN(CC4=C(Cl)C=CC=C4)CC3</chem>          |
| 33 | <chem>O=C1NC2=C(C=CC(C)=C2)N1C3CCN(CC4=C(Cl)C=CC=C4)CC3</chem>           |
| 34 | <chem>O=C1NC2=C(C=CC(Br)=C2)N1C3CCN(CC4=C(Cl)C=CC=C4)CC3</chem>          |
| 35 | <chem>O=C1NC2=C(C=CC(F)=C2)N1C3CCN(CC4=C(Cl)C=CC=C4)CC3</chem>           |
| 36 | <chem>O=C1NC2=C(C=CC(OC)=C2)N1C3CCN(CC4=C(Cl)C=CC=C4)CC3</chem>          |
| 37 | <chem>O=C1NC2=C(C=CC(OC(F)(F)F)=C2)N1C3CCN(CC4=C(Cl)C=CC=C4)CC3</chem>   |
| 38 | <chem>O=C1NC2=C(C=CC(S(=O)(C)=O)=C2)N1C3CCN(CC4=C(Cl)C=CC=C4)CC3</chem>  |
| 39 | <chem>O=C1NC2=C(C=CC(C#N)=C2)N1C3CCN(CC4=C(Cl)C=CC=C4)CC3</chem>         |
| 40 | <chem>O=C1NC2=C(C=CC=C2Cl)N1C3CCN(CC4=C(F)C=C(Br)C=C4)CC3</chem>         |
| 41 | <chem>O=C1NC2=C(C=CC(Cl)=C2)N1C3CCN(CC4=C(F)C=C(Br)C=C4)CC3</chem>       |
| 42 | <chem>O=C1NC2=C(C=C(Cl)C=C2)N1C3CCN(CC4=C(F)C=C(Br)C=C4)CC3</chem>       |
| 43 | <chem>O=C1NC2=C(C=C(Cl)C=C2Cl)N1C3CCN(CC4=C(F)C=C(Br)C=C4)CC3</chem>     |
| 44 | <chem>O=C1NC2=C(C=C(Cl)C(Cl)=C2)N1C3CCN(CC4=C(F)C=C(Br)C=C4)CC3</chem>   |
| 45 | <chem>O=C1NC2=C(C(Cl)=CC(Cl)=C2Cl)N1C3CCN(CC4=C(F)C=C(Br)C=C4)CC3</chem> |
| 46 | <chem>O=C1NC2=C(C=C(Cl)C(Cl)=C2)N1C3CCN(CC4=CC=C(Br)C=C4)CC3</chem>      |
| 47 | <chem>O=C1NC2=C(C=C(Cl)C(Cl)=C2)N1C3CCN(CC4=CC=C(Br)C=C4)CCC3</chem>     |
| 48 | <chem>O=C1NC2=C(C=C(Cl)C(Cl)=C2)N1[C@@H]3CCN(CC4=CC=C(Br)C=C4)C3</chem>  |
| 49 | <chem>O=C1NC2=C(C=C(Cl)C(Cl)=C2)N1[C@H]3CCN(CC4=CC=C(Br)C=C4)C3</chem>   |
| 50 | <chem>O=C1NC2=C(C=C(Cl)C(Cl)=C2)N1[C@@H]3CCCN(CC4=CC=C(Br)C=C4)C3</chem> |
| 51 | <chem>O=C1NC2=C(C=C(Cl)C(Cl)=C2)N1[C@H]3CCCN(CC4=CC=C(Br)C=C4)C3</chem>  |

## References

- 
- <sup>1</sup> Shum, P. W.; Peet, N. P.; Weintraub, P. M.; Le, T. B.; Zhao, Z.; Barbone, F.; Cashman, B.; Tsay, J.; Dwyer, S.; Loos, P. C.; Powers, E. A.; Kropp, K.; Wright, P. S.; Bitonti, A.; Dumont, J.; Borcharding, D. R. The Design and Synthesis of Purine Inhibitors of CDK2.III. *Nucleosides, Nucleotides and Nucleic Acids* **2001**, *20*, 1067-1078.
- <sup>2</sup> Schmid, C. L.; Kennedy, N. M.; Ross, N. C.; Lovell, K. M.; Yue, Z.; Morgenweck, J.; Cameron, M. D.; Bannister, T. D.; Bohn, L. M. Bias Factor and Therapeutic Window Correlate to Predict Safer Opioid Analgesics. *Cell* **2017**, *171*, 1165-1175.
- <sup>3</sup> Yoshihisha, A.; Toshiaki, K.; Tomohisa, M.; Kenji, A.; Naoko, M.; Yumiko, Y.; Takashi, W.; Masaki, T.; Toyokazu, H. Compounds Having both of Opioid  $\mu$  Receptor Agonist Activity and Dopamine D2 Receptor Antagonist Activity as Remedies for Pain. WO 2,000,038,720 A1, **1999**.
- <sup>4</sup> Poulain, R.; Horvath, D.; Bonnet, B.; Eckhoff, C.; Chapelain, B.; Bodinier, M. C.; Déprez, B. From Hit to Lead. Combining two Complementary Methods for Focused Library Design. Application to Mu-Opioid Ligands. *J. Med. Chem.* **2001**, *44*, 3378-3390.
- <sup>5</sup> Morini, C. C.; Maguire, P. A.; Loew, G. H. Molecular Determinants of Mu Receptor Recognition for the Fentanyl Class of Compounds. *Molec. Pharmacol.* **1992**, *41*, 185-196.
- <sup>6</sup> Kawamoto, H.; Ozaki, S.; Itoh, Y.; Miyaji, M.; Arai, S.; Nakashima, H.; Kato, T.; Ohta, H.; Iwasawa, Y. Discovery of the First Potent and Selective Small Molecule Opioid Receptor-like (ORL1) Antagonist: 1-[(3*R*,4*R*)-1-Cylcooctylmethyl-3-hydroxymethyl-4-piperidyl]-3-ethyl-1,3-dihydro-2*H*-benzimidazole-2-one (J-113397). *J. Med. Chem.* **1999**, *42*, 5061-5063.
- <sup>7</sup> Janssen, P. A. J. Benzimidazolinyperdines. U.S. Patent 3,318,900, **1967**.
- <sup>8</sup> Bannister, T. D.; Bohn, L. M.; Schmid, C. L. Benzimidazolones as Signaling-Biased Mu-Opioid Receptor Agonists and their Preparation. U.S. Patent 62,308,333, **2017**.
